# Supplementary material
Source: PubMed Central journal article supplement (PMC2535813)
Supplement: NIHMS62896-supplement-11.pdf [file NIHMS62896-supplement-11.pdf]

Electronic Supporting Information **Part 1**

*meso*-Tetra(pentafluorophenyl)porphyrin as an Efficient  
Platform for Combinatorial Synthesis and the Selection  
of New Photodynamic Therapeutics using a Cancer Cell  
Line<sup>†</sup>

*Diana Samaroo,<sup>a</sup> Mikki Vinodu,<sup>a</sup> Xin Chen,<sup>a</sup> Charles Michael Drain<sup>a,b\*</sup>*

<sup>a</sup>Department of Chemistry and Biochemistry, Hunter College and the Graduate Center of the City University of New York, 695 Park Avenue, New York, NY 10021, <sup>b</sup>The Rockefeller University, 1230 York Avenue, New York, NY 10021

\* To whom correspondence should be addressed: [cdrain@hunter.cuny.edu](mailto:cdrain@hunter.cuny.edu). Fax: 212 772 5332

Dedicated to the memory of R. Bruce Merrifield, friend and colleague.

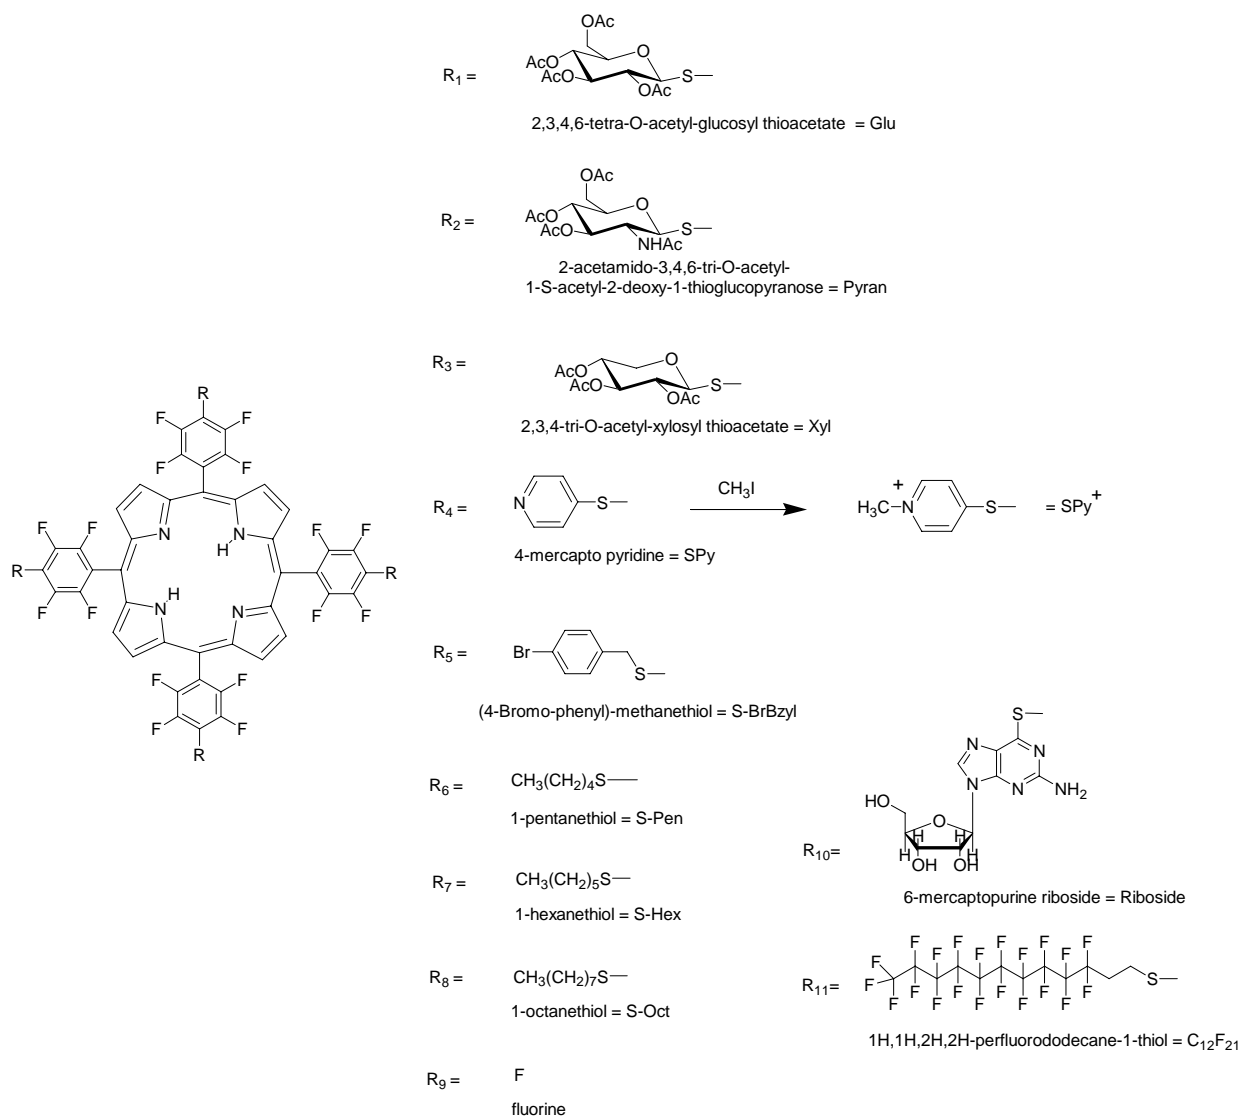

**Library 1 (21-member) = R<sub>1</sub>, R<sub>3</sub>, R<sub>4</sub>**

**Library 2 (55-member) = R<sub>1</sub>, R<sub>2</sub>, R<sub>3</sub>, R<sub>4</sub>**

**Library 3 (666-member) = R<sub>1</sub>, R<sub>3</sub>, R<sub>4</sub>, R<sub>5</sub>, R<sub>6</sub>, R<sub>7</sub>, R<sub>8</sub>, R<sub>9</sub>**

**Scheme ESI-1.** Core porphyrin and peripheral substituents.

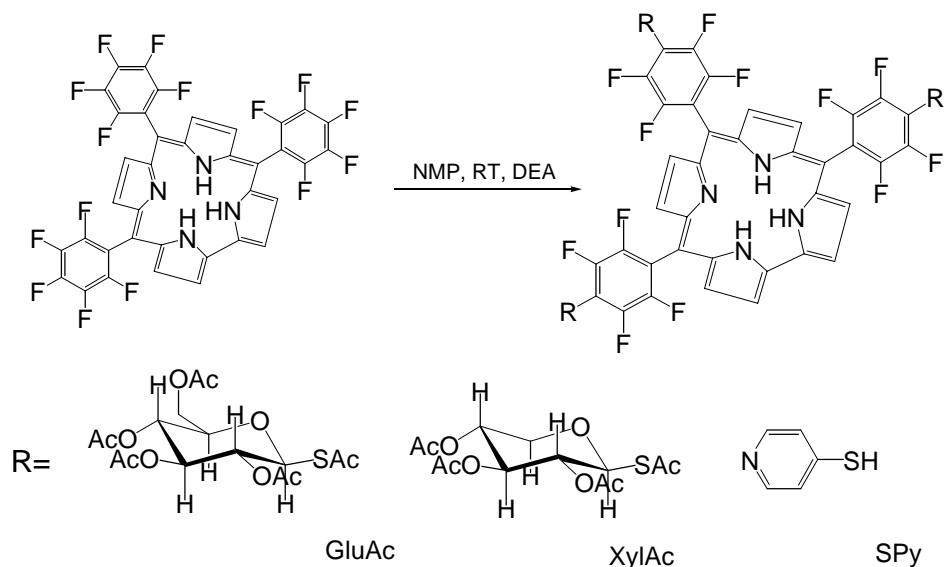

**Scheme ESI-2:** Solution phase combinatorial reaction scheme using tri(pentafluorophenyl)corrole. Protected glucose and xylose thioacetates, as well as thio pyridine are used as the nucleophiles. Three substituents would lead to an 18-member library (see mass spectrometry –Figure ESI-17).

### Corrole Libraries: L4 and L5

The efficiency of the nucleophilic coupling of thio moieties with p-fluorine atom of the perfluoro corrole was examined by using protected thio glucose. When essentially the same conditions employed for the porphyrin coupling are used (6.0 equivalents of thio glucose in DMF with 20 equivalents of DEA at room temperature for 24 hours), the major product is found to be the one where only the opposing perfluorophenyl groups have reacted. The tri-substituted derivative is formed in more than 60% yield when 9.0 equivalents of the thioglucose reagent are added to the triPCF<sub>15</sub> in DMF with 30 equivalents of DEA at room temperature and reacted for 48 h.

The synthesis of a small combinatorial library based on the triPCF<sub>15</sub> core (scheme ESI-2) was attempted using the conditions developed for the thioglucose substitution. First we employed 3 equivalents each of protected thioglucose, protected thioxylose and thiopentane. The reaction was done in DMF containing 40 equivalents of DEA at room temperature for 48h. Evaluation of the ESI MS spectra of the crude product mixture showed only partially substituted corrole systems. Increasing the quantity of the thio derivatives and increasing the reaction time do not significantly improve library yields, and thiopentane is found to be more reactive than the thio sugars. Neither thioimidazole nor thioundecanoic acid react with the triPCF<sub>15</sub> core to the extent as thioglucose as evidenced by ESI-MS spectra, which indicated a distribution of mono, di and tri substituted corrole-glucose systems. Replacing DMF with N-methylpyrrolidone (NMP) and examining the competition between thioglucose and thiopyridine still results in mainly the glycosylated derivatives.

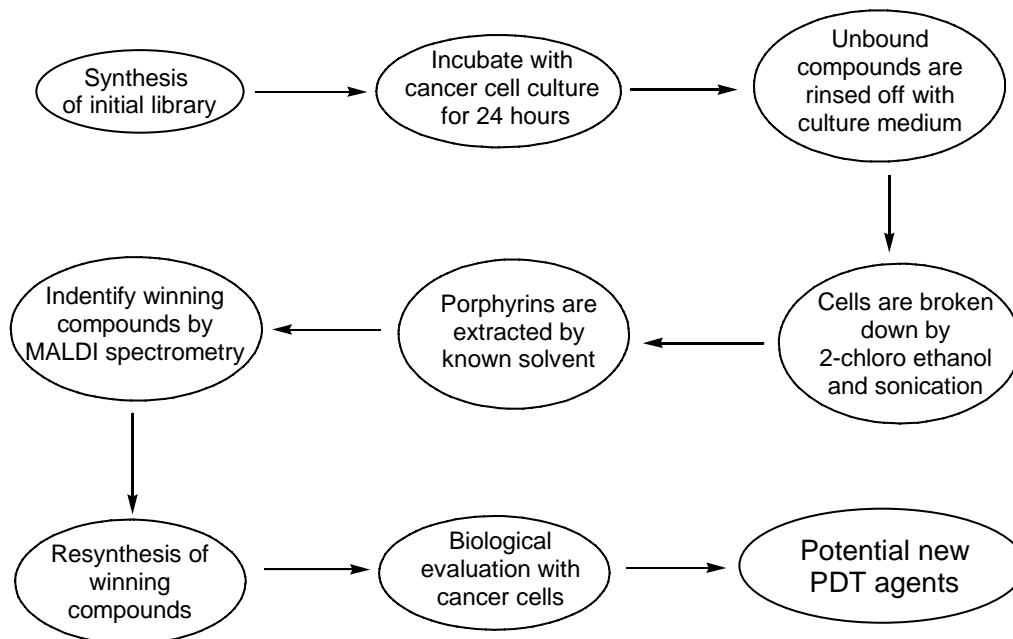

**Scheme ESI-3.** Strategy of selection of winning compounds using a human breast cancer cell line (MDA-MB-231).

**Identification of selected compounds by MALDI-MS.** The noise in the MALDI spectra is largely due to both instrumental noise and some small amount of methanol-soluble compounds extracted along with the porphyrins. This selection assay was repeated three times with the same results. No attempt was made to purify the porphyrins from the cell extract to avoid losing or missing some compounds. The total amount of porphyrins extracted from the cancer cells, as estimated by ultraviolet-visible spectra is typically on the order of 10  $\mu\text{g}/0.2\text{ mL}$ . At this stage of the research program, we do not know if there are any bio-conjugated porphyrins present which would manifest themselves as species with unknown molar mass.

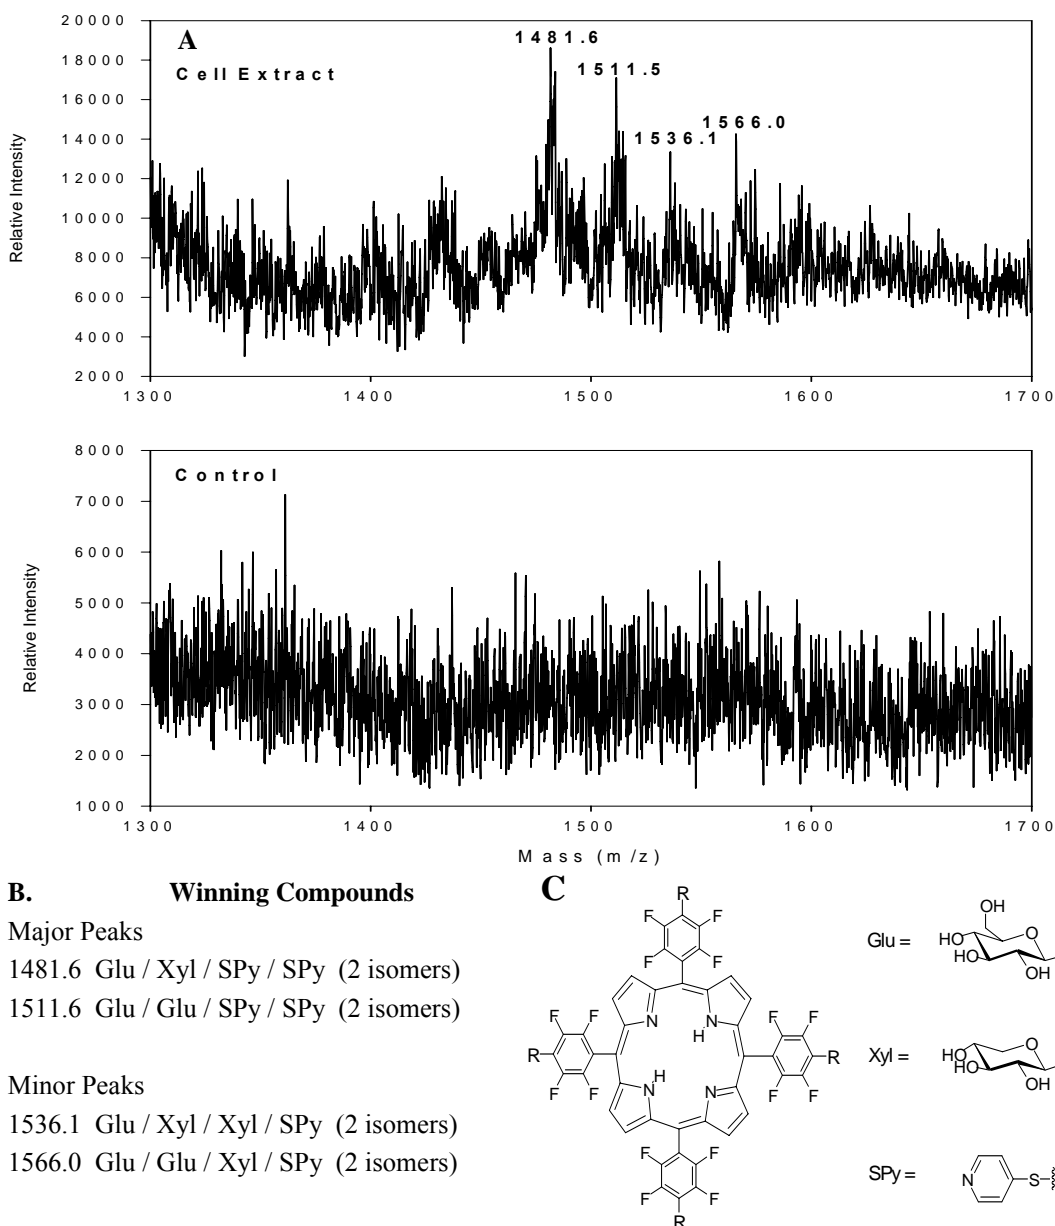

**Figure ESI-1.** Selection of winning compounds from human breast cancer (MDA-MB-231) cells. (A) MALDI-MS spectra of cell extract with library and control. The spectra are representative for more than 3 separate experiments. (B) Winning compounds determined by molecular weights. (C) The structures of winning compounds.

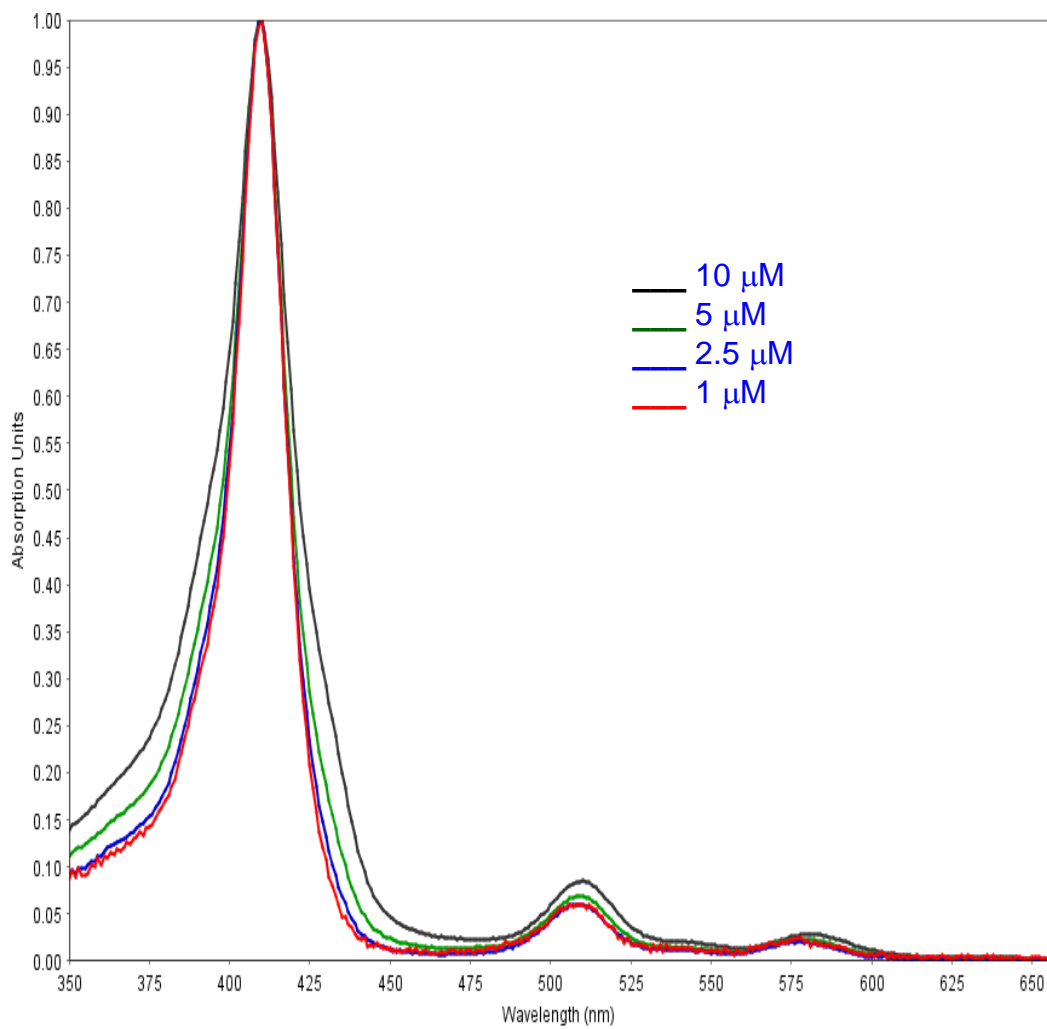

**Figure ESI-2:** Normalized absorption spectra for varying concentrations of Glu/Glu/Glu/Glu in aqueous PBS shows that this compound begins to aggregate at 5-10 μM.

## Mass Spectrometry of Porphyrin Libraries

### L1. 21-member library with GluAc, XylAc, SPy

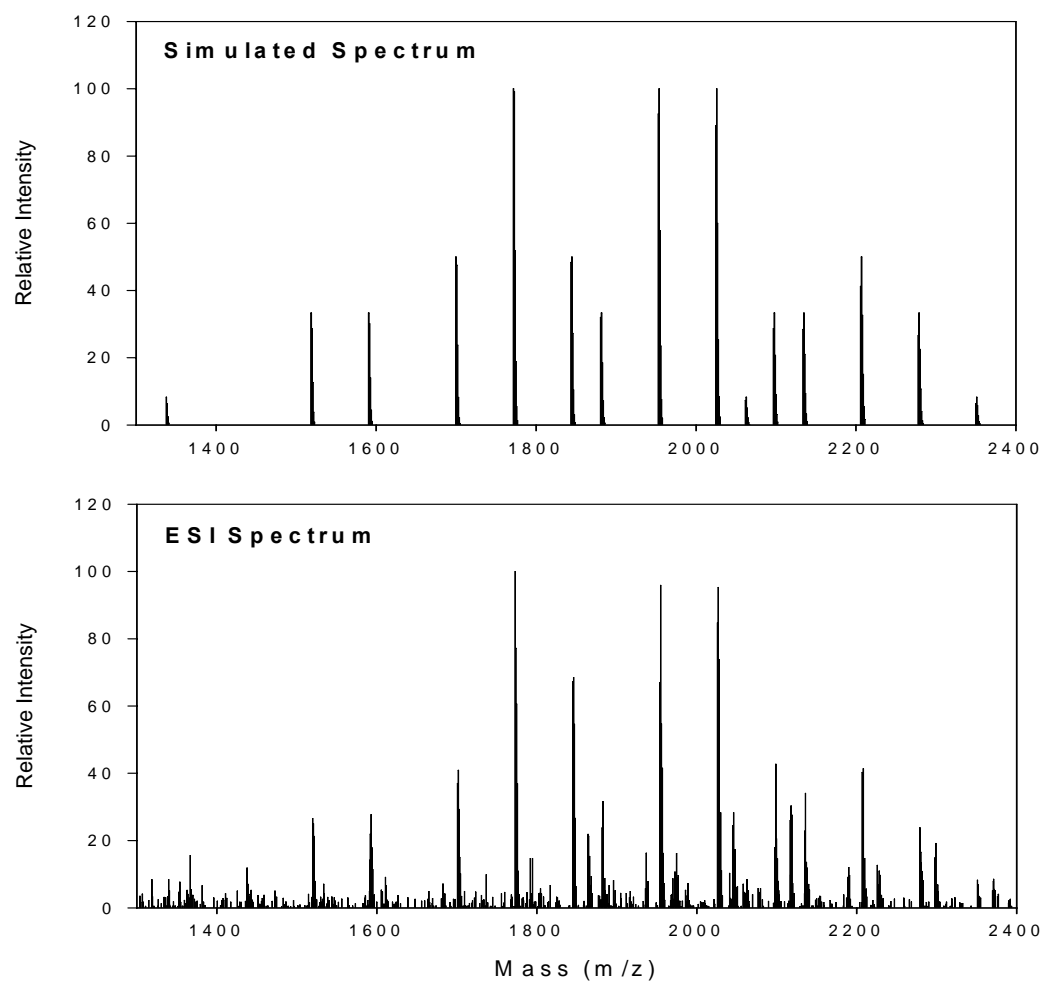

**Figure ESI-3.** Simulated (top) and experimental ESI-MS (bottom) spectra of 21-member porphyrin library (15 isobaric peaks expected) with acetyl protected sugar moieties and thiopyridine: R= GluAc, XylAc, SPy. The actual ESI-MS spectrum is typically of more than three separate preparations.

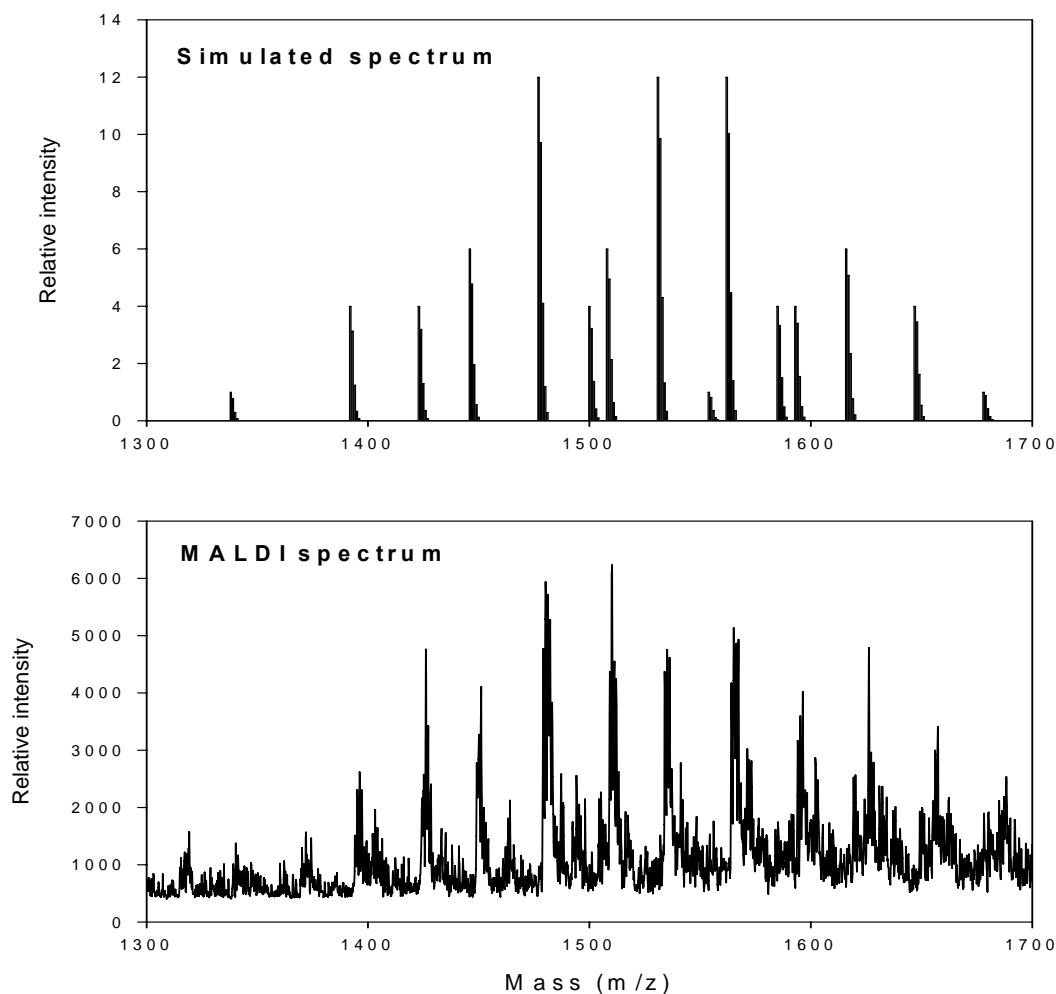

**Figure ESI-4.** Simulated (top) and experimental MALDI-MS (bottom) spectra of the same 21-member porphyrin library as in figure ESI-3, R= Glu, Xyl, SPy, (15 isobaric peaks expected) but with unprotected sugar moieties (Glu, Xyl, SPy). The MALDI-MS spectrum is representative of four separate preparations.



*L2. 55-member library with GluAc, XylAc, SPy, PyranAc*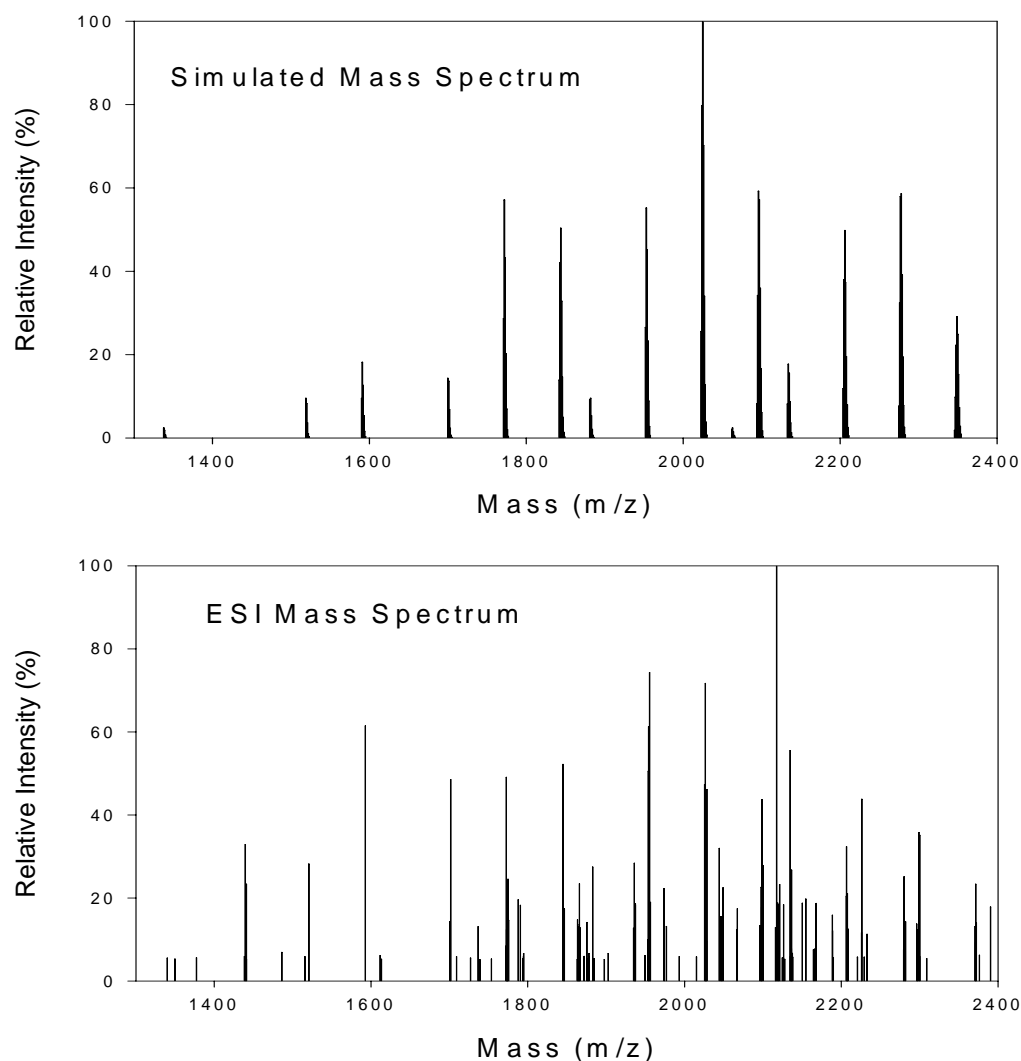

**Figure ESI-5.** Simulated mass spectrum (top) and ESI mass spectrum (bottom) of 55-member solution-phase combinatorial porphyrin library, R=GluAc, XylAc, SPy, PyranAc. 35 isobaric peaks are expected.

L3. 666 member library with R= GluAc, XylAc, SPy, SPen, SHex, SOct, SBrBzyl, F

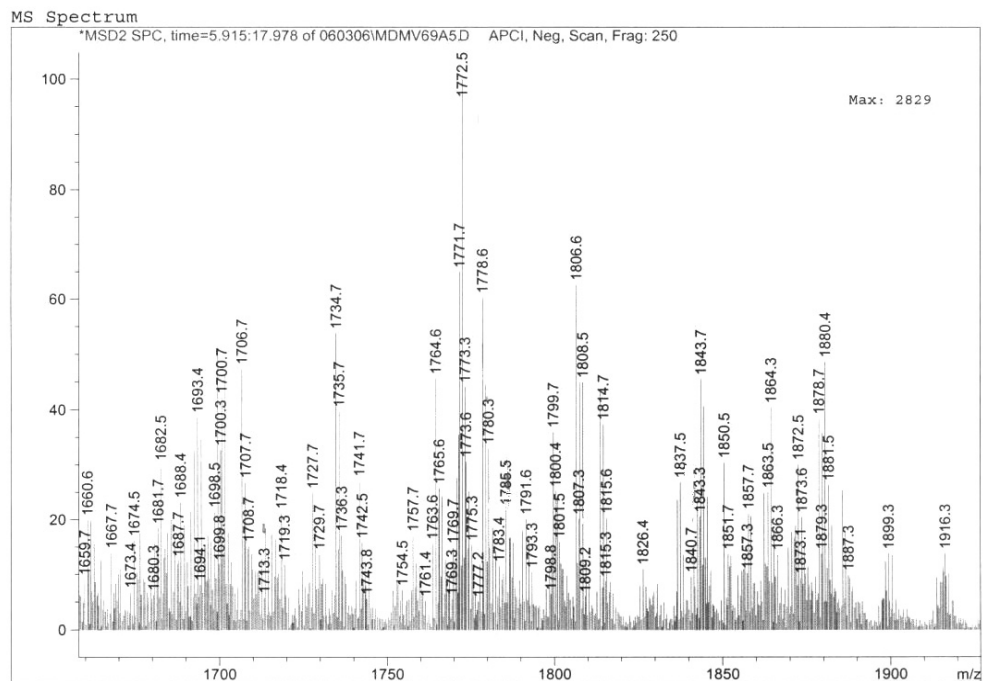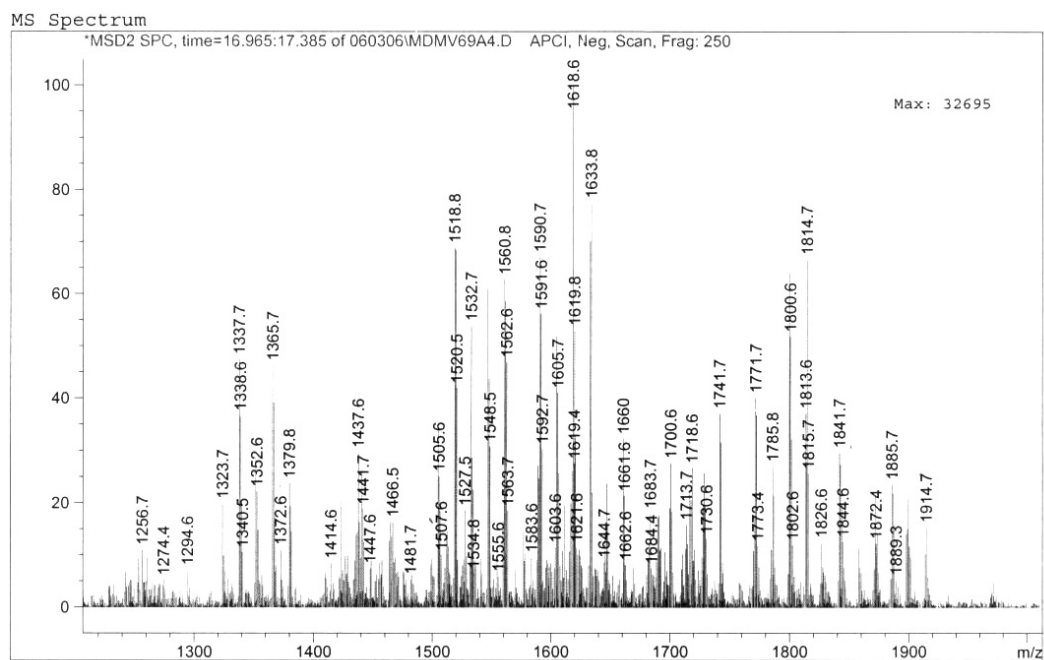

**Figure ESI-6:** ESI-MS of selected fractions of 666-combinatorial porphyrin library, HPLC fraction 1 (top) and 2 (bottom).

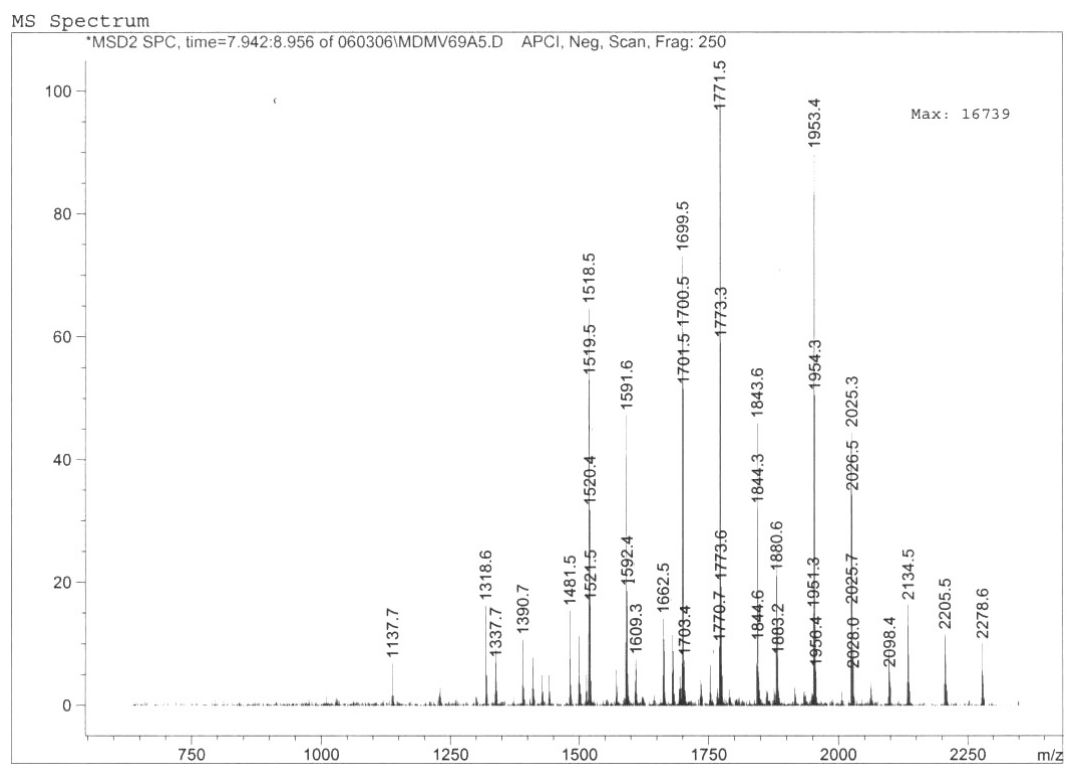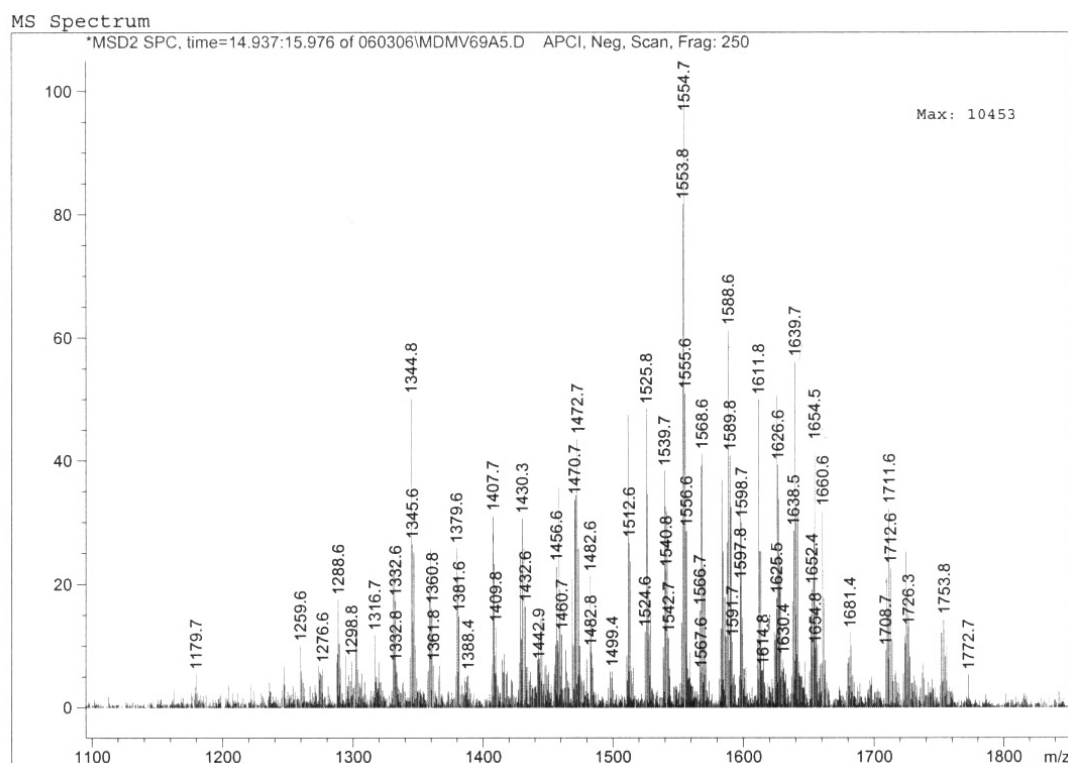

**Figure ESI-7:** ESI-MS of selected fractions of 666-combinatorial porphyrin library, HPLC fraction 3 (top) and 4 (bottom).

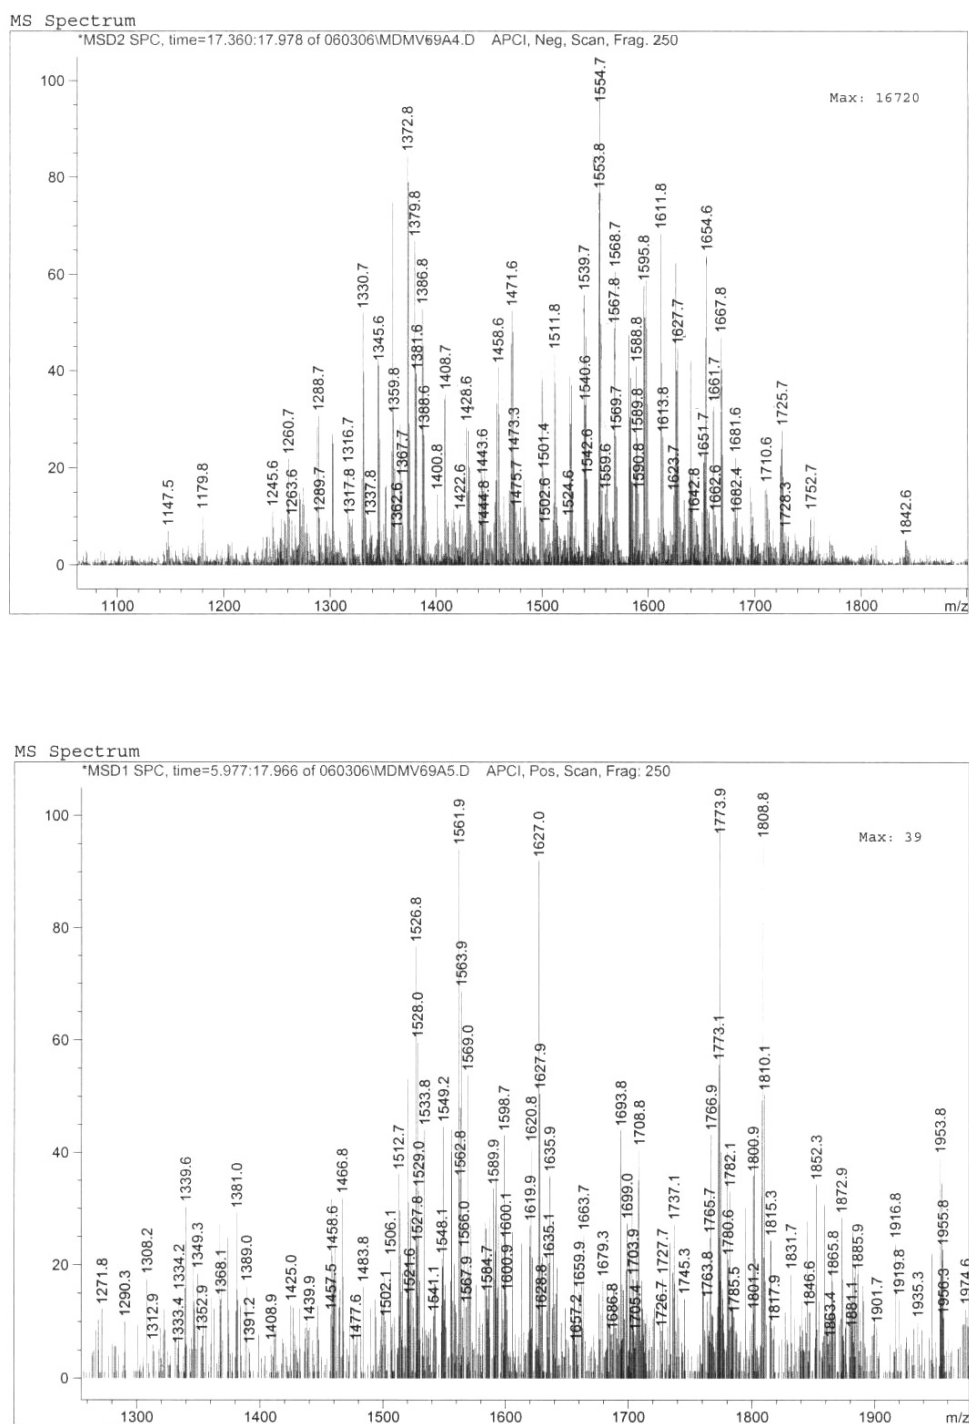

**Figure ESI-8:** ESI-MS of selected fractions of 666-combinatorial porphyrin library, HPLC fraction 5 (top) and 6 (bottom).

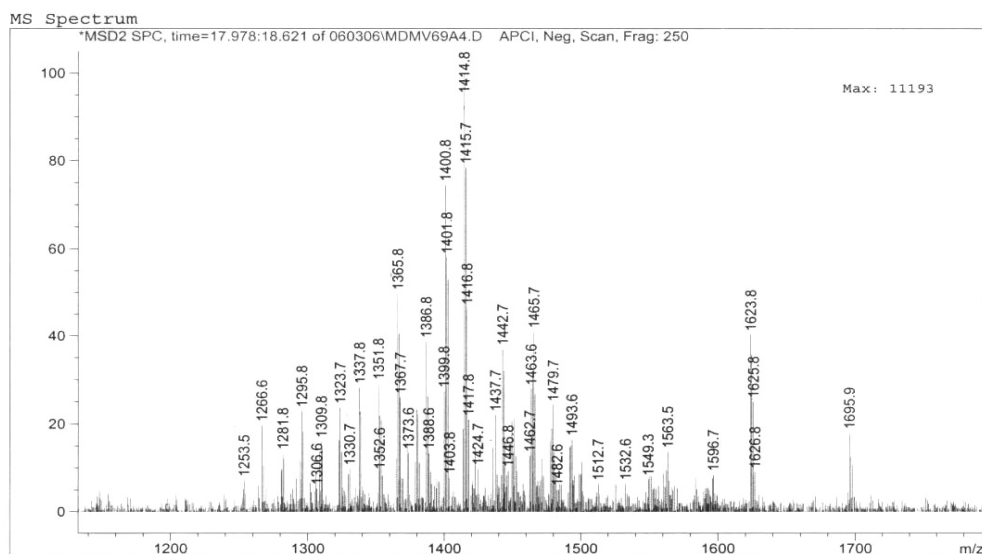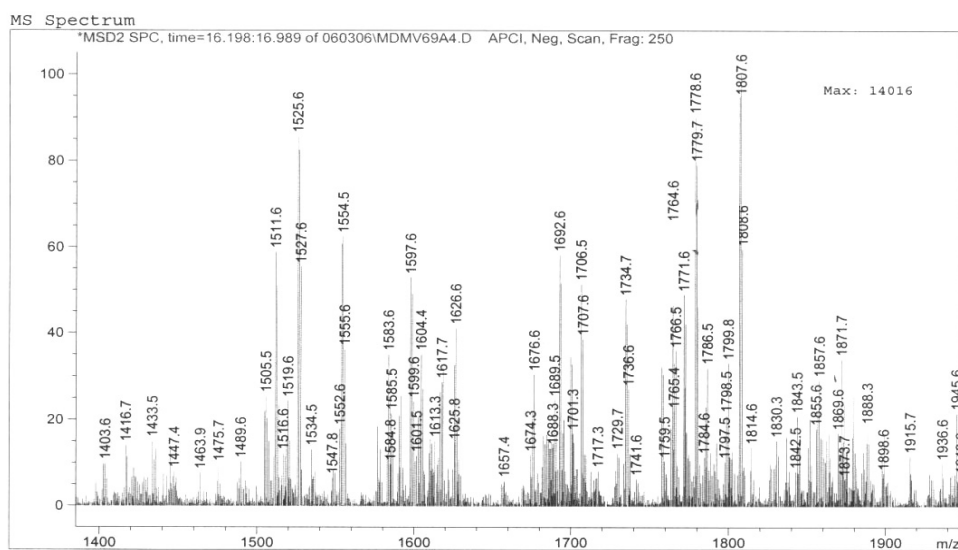

**Figure ESI-9:** ESI-MS of selected fractions of 666-combinatorial porphyrin library, HPLC fraction 7 (top) and 8 (bottom).

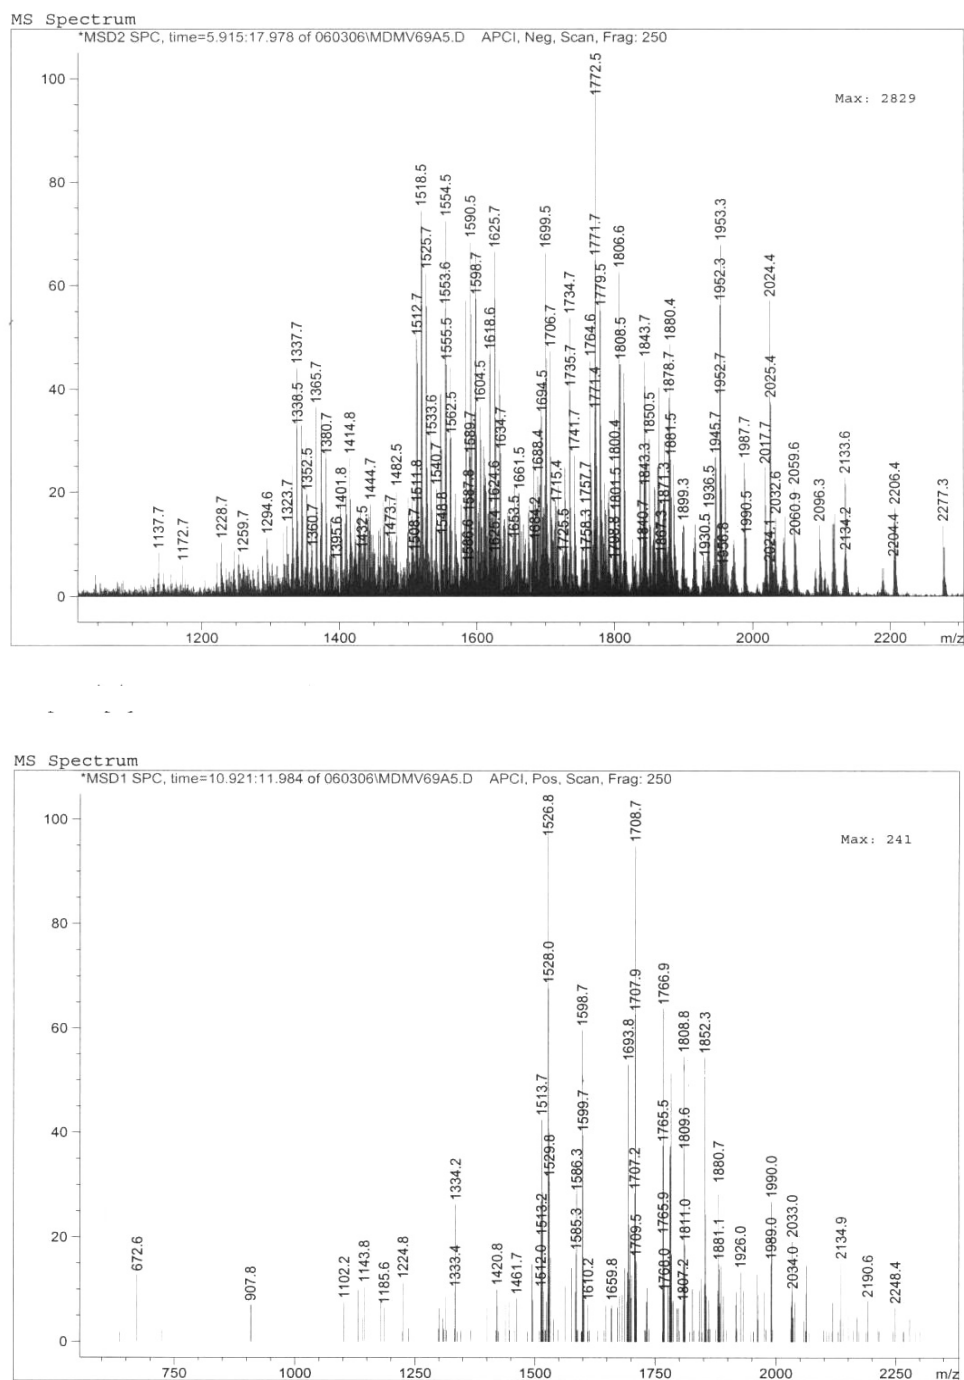

**Figure ESI-10:** ESI-MS of selected fractions of 666-combinatorial porphyrin library, HPLC fraction 9 (top) and 10 (bottom).

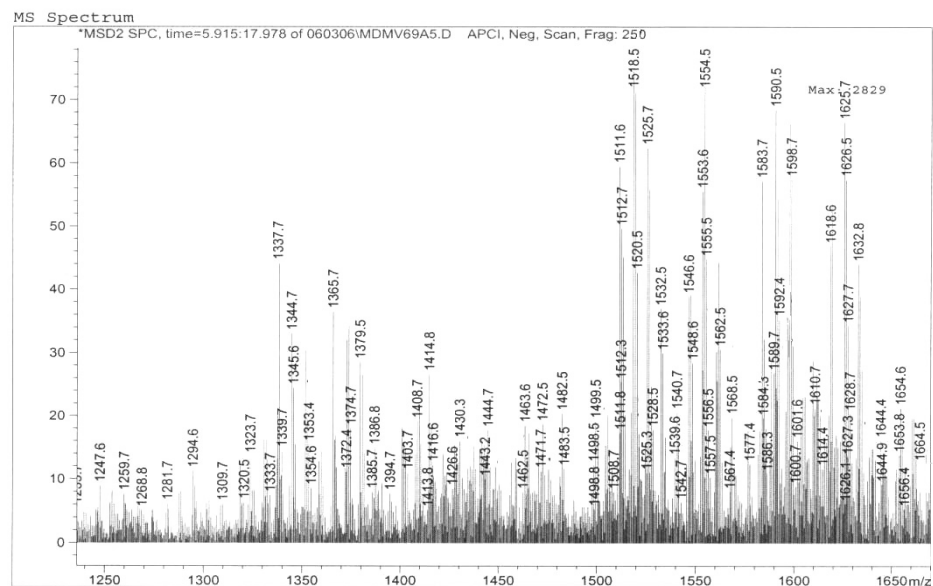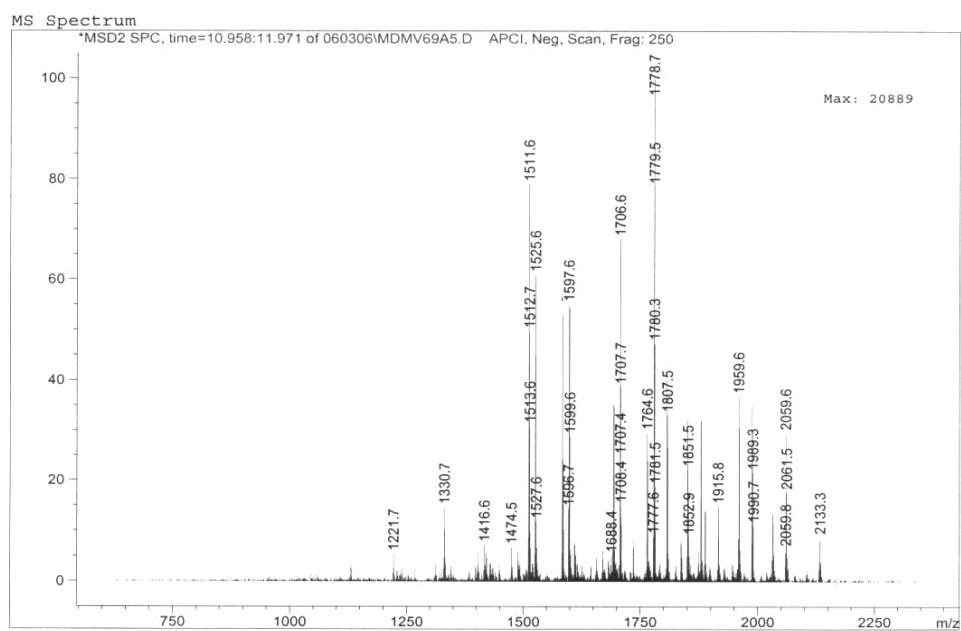

**Figure ESI-11:** ESI-MS of selected fractions of 666-combinatorial porphyrin library, HPLC fraction 11 (top) and 12 (bottom).

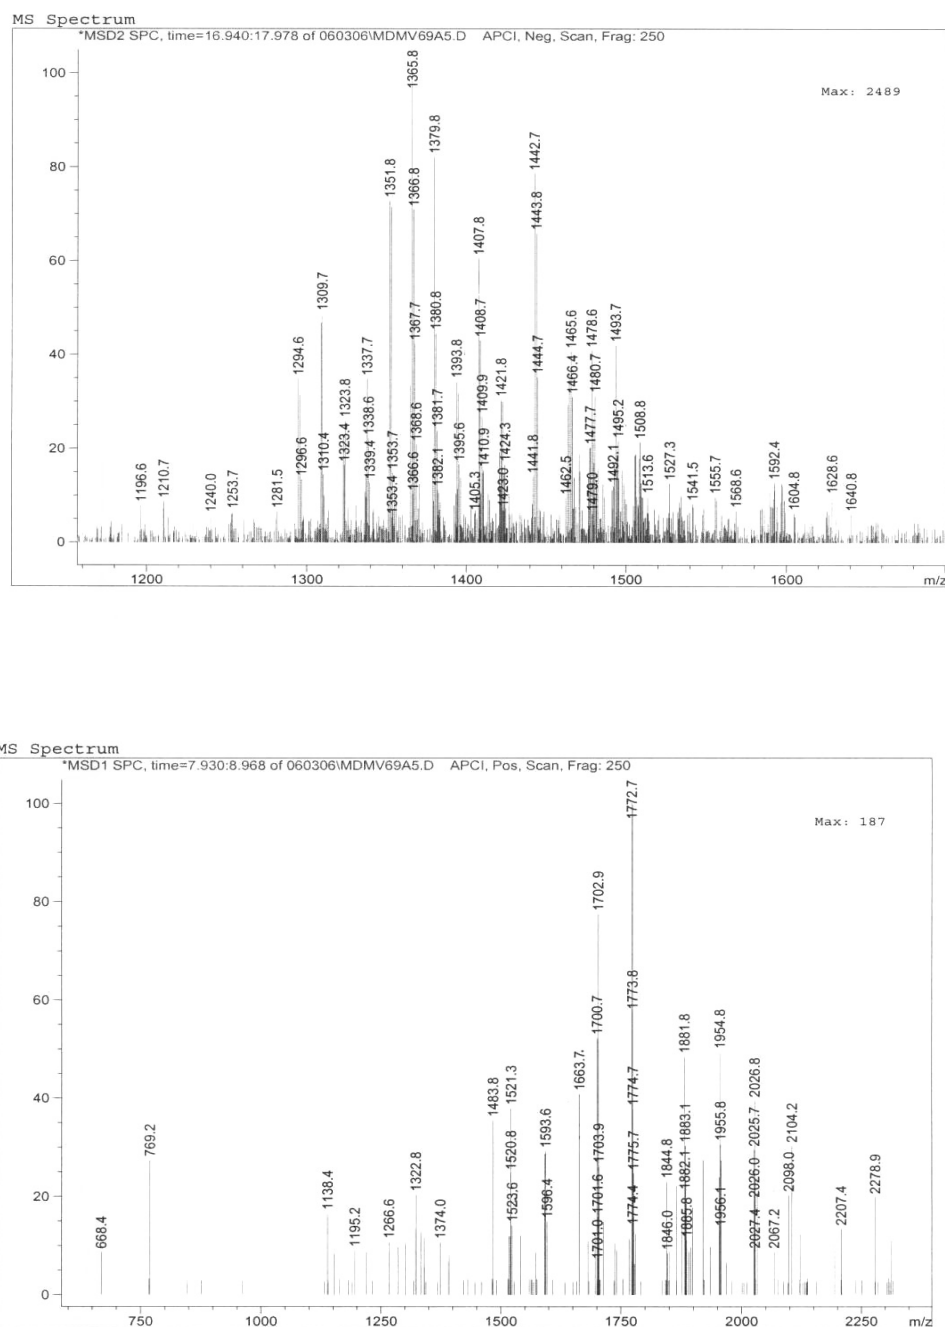

**Figure ESI-12:** ESI-MS of selected fractions of 666-combinatorial porphyrin library, HPLC fraction 13 (top) and 14 (bottom).



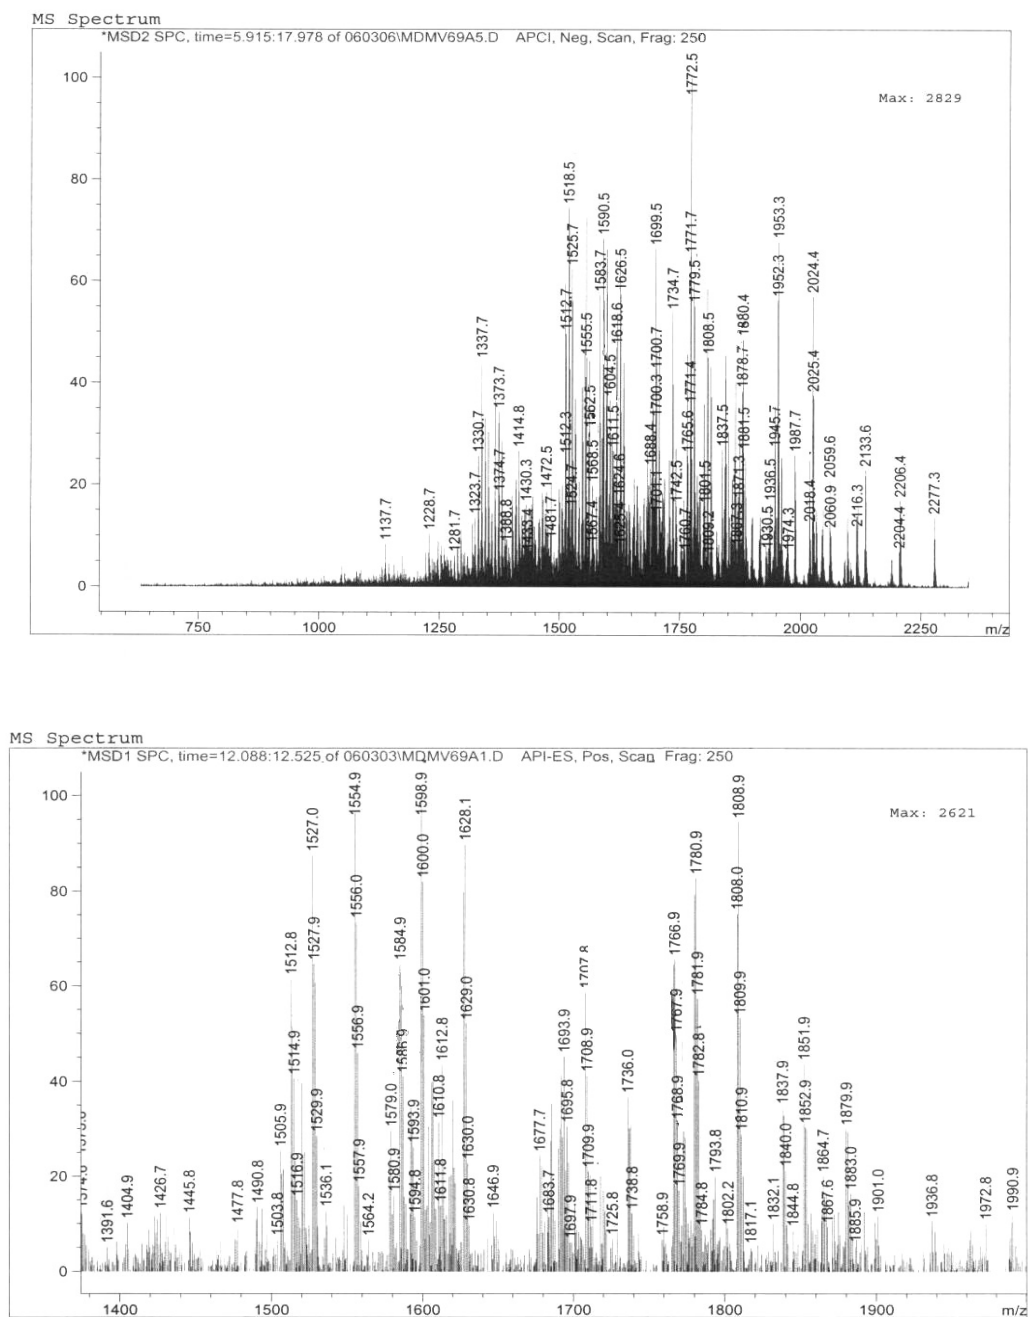

**Figure ESI-13:** ESI-MS of selected fractions of 666-combinatorial porphyrin library, HPLC fraction 15 (top) and 16 (bottom).

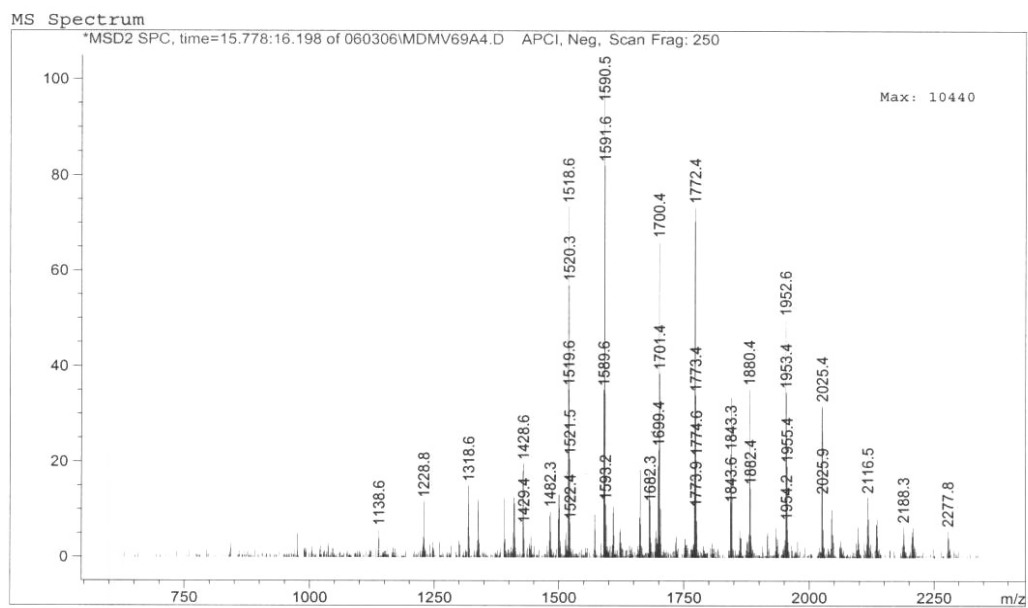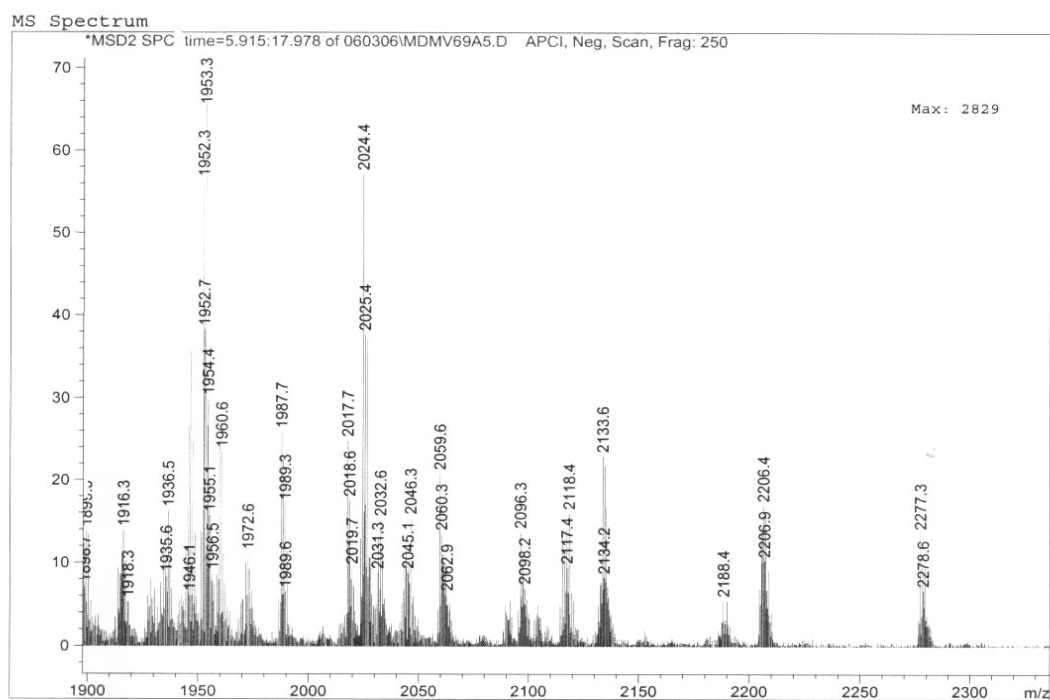

**Figure ESI-14:** ESI-MS of selected fractions of 666-combinatorial porphyrin library, HPLC fraction 17 (top) and 18 (bottom).

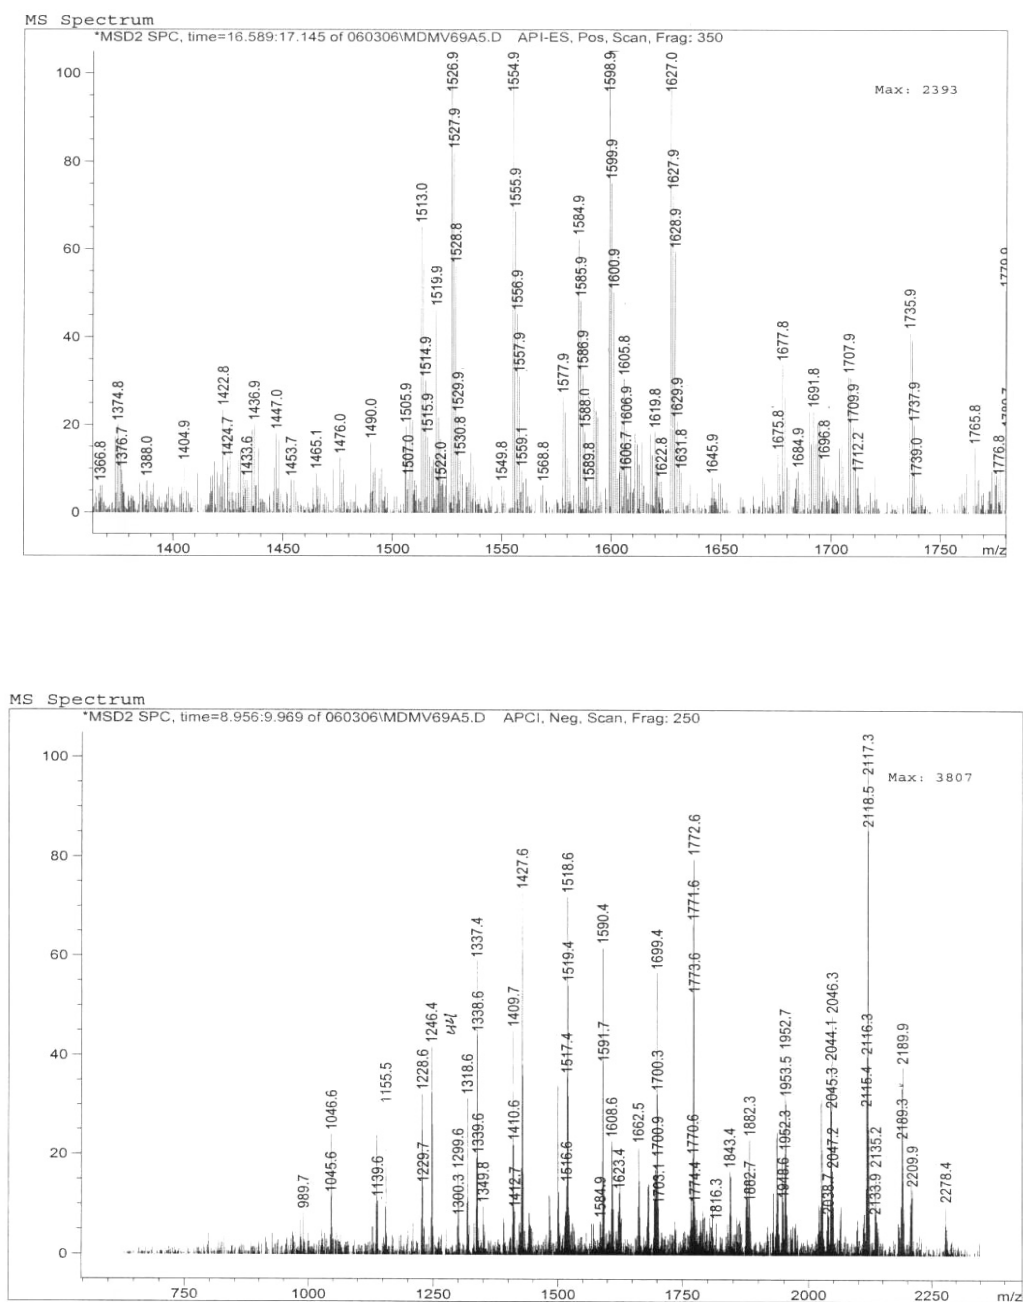

**Figure ESI-15:** ESI-MS of selected fractions of 666-combinatorial porphyrin library, HPLC fraction 19 (top) and 20 (bottom).

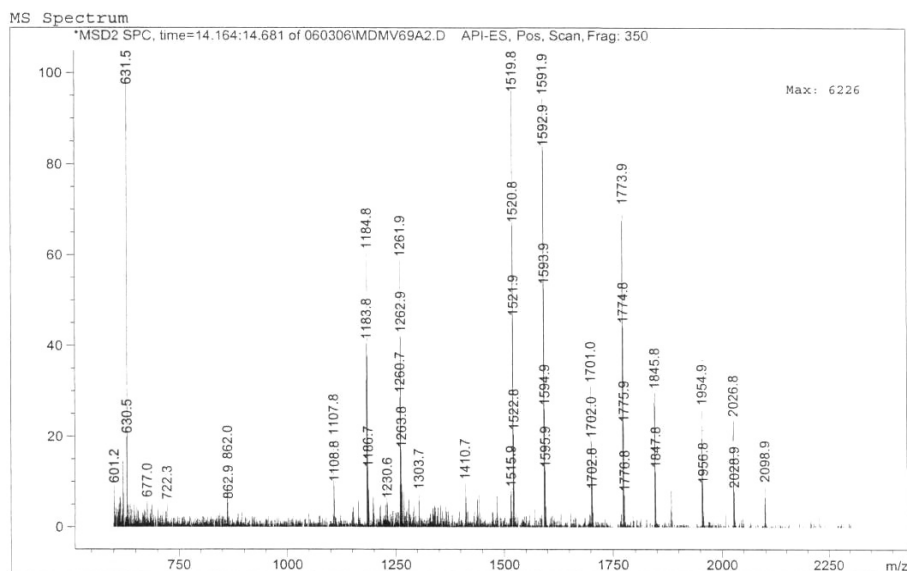

**Figure ESI-16:** ESI-MS of selected fractions of 666-combinatorial porphyrin library, HPLC fraction 21.

**Table ESI-1.** List of compounds identified by ESI-MS from the possible 330 isobaric species of the 666-porphyrin library. (Only 15 compounds were not detected directly in the ESI-MS, but out of which 14 can be identified by considering them as the Na/Cl/K/formate adducts.)

|    | 5,10,15,20                                    | MW   |
|----|-----------------------------------------------|------|
| 1  | F/F/F/F - not detected at all                 | 974  |
| 2  | F/F/F/SPen -only Na adduct detected           | 1058 |
| 3  | F/F/F/SPy                                     | 1065 |
| 4  | F/F/F/SHex                                    | 1072 |
| 5  | F/F/F/SOOct -only K adduct detected           | 1100 |
| 6  | F/F/SPen/SPen                                 | 1142 |
| 7  | F/SPy/F/SPen                                  | 1149 |
| 8  | F/SPy/F/SPy                                   | 1156 |
| 9  | F/F/SPen/SHex                                 | 1156 |
| 10 | F/F/F/SBrBzyl                                 | 1157 |
| 11 | F/F/SPy/SHex                                  | 1163 |
| 12 | F/F/SHex/SHex                                 | 1170 |
| 13 | F/SPen/F/SOOct                                | 1184 |
| 14 | F/F/SPy/SOOct                                 | 1191 |
| 15 | F/F/SHex/SOOct                                | 1198 |
| 16 | F/F/SOOct/Soct -only Na adduct detected       | 1226 |
| 17 | F/SPen/SPen/SPen -only Na adduct detected     | 1226 |
| 18 | F/SPy/SPen/SPen -only formate adduct detected | 1233 |
| 19 | F/SPen/SHex/SPen                              | 1240 |
| 20 | F/SPy/SPy/SPen                                | 1240 |
| 21 | F/SPen/F/SBrBzyl                              | 1241 |
| 22 | F/F/F/XylAc                                   | 1246 |
| 23 | F/SPy/SPen/SHex                               | 1247 |
| 24 | F/SPy/SPy/SPy                                 | 1247 |

|    |                                           |      |
|----|-------------------------------------------|------|
| 25 | F/F/SPy/SBrBzyl - only Na adduct detected | 1248 |
| 26 | F/SPy/SPy/SHex                            | 1254 |
| 27 | F/SHex/SPen/SHex                          | 1254 |
| 28 | F/F/SHex/SBrBzyl                          | 1255 |
| 29 | F/SPy/SHex/SHex                           | 1261 |
| 30 | F/SPen/SPen/SOOct                         | 1268 |
| 31 | F/SHex/SHex/SHex                          | 1268 |
| 32 | F/SPy/SOOct/SPen                          | 1275 |
| 33 | F/SPen/SOOct/SHex                         | 1282 |
| 34 | F/SPy/SPy/SOOct                           | 1282 |
| 35 | F/F/SOOct/SBrBzyl                         | 1283 |
| 36 | F/SHex/SPy/SOOct                          | 1289 |
| 37 | F/SHex/SHex/SOOct                         | 1296 |
| 38 | F/SPen/SOOct/SOOct                        | 1310 |
| 39 | SPen/SPen/SPen/SPen                       | 1310 |
| 40 | F/SPy/SOOct/SOOct                         | 1317 |
| 41 | SPy/SPen/SPen/SPen                        | 1317 |
| 42 | F/F/F/GluAc                               | 1318 |
| 43 | SPy/SPy/SPen/SPen                         | 1324 |
| 44 | F/SHex/SOOct/SOOct                        | 1324 |
| 45 | SPen/SPen/SPen/SHex                       | 1324 |
| 46 | F/SPen/SBrBzyl/SPen                       | 1325 |
| 47 | F/F/XylAc/SPen                            | 1330 |
| 48 | SPy/SPen/SHex/SPen                        | 1331 |
| 49 | SPy/SPy/SPy/SPen                          | 1331 |
| 50 | F/SPen/SPy/SBrBzyl                        | 1332 |
| 51 | F/XylAc/F/SPy                             | 1337 |
| 52 | SPy/SPen/SPy/SHex                         | 1338 |
| 53 | SPy/SPy/SPy/SPy                           | 1338 |
| 54 | SPen/SPen/SHex/SHex                       | 1338 |
| 55 | F/SPen/SHex/SBrBzyl                       | 1339 |
| 56 | F/SPy/SPy/SBrBzyl                         | 1339 |
| 57 | F/SBrBzyl/F/SBrBzyl                       | 1340 |
| 58 | F/XylAc/F/SHex                            | 1344 |
| 59 | SPy/SPen/SHex/SHex                        | 1345 |
| 60 | SPy/SPy/SPy/SHex                          | 1345 |
| 61 | F/SHex/SPy/SBrBzyl                        | 1346 |
| 62 | SPy/SHex/SPy/SHex                         | 1352 |
| 63 | SPen/SPen/SPen/SOOct                      | 1352 |
| 64 | F/SOOct/SOOct/SOOct                       | 1352 |
| 65 | SPen/SHex/SHex/SHex                       | 1352 |
| 66 | F/SHex/SBrBzyl/SHex                       | 1353 |
| 67 | SPy/SPen/SPen/SOOct                       | 1359 |
| 68 | SPy/SHex/SHex/SHex                        | 1359 |
| 69 | SPen/SPen/SHex/SOOct                      | 1366 |
| 70 | SPy/SPen/SPy/SOOct                        | 1366 |
| 71 | SHex/SHex/SHex/SHex                       | 1366 |
| 72 | F/SPen/SOOct/SBrBzyl                      | 1367 |
| 73 | F/XylAc/F/SOOct                           | 1372 |
| 74 | SPy/SPy/SPy/SOOct                         | 1373 |
| 75 | SPy/SHex/SPen/SOOct                       | 1373 |
| 76 | F/SPy/SOOct/SBrBzyl                       | 1374 |
| 77 | SPy/SPy/SHex/SOOct                        | 1380 |
| 78 | SPen/SHex/SHex/SOOct                      | 1380 |
| 79 | F/SOOct/SHex/SBrBzyl                      | 1381 |
| 80 | SPy/SHex/SOOct/SHex                       | 1387 |
| 81 | SPen/SOOct/SPen/SOOct                     | 1394 |

|     |                           |                               |
|-----|---------------------------|-------------------------------|
| 82  | SHex/SHex/SHex/SOct       | 1394                          |
| 83  | SPy/SPen/SOct/SOct        | 1401                          |
| 84  | F/F/GluAc/SPen            | 1402                          |
| 85  | SPy/SPy/SOct/SOct         | 1408                          |
| 86  | SPen/SOct/SHex/SOct       | 1408                          |
| 87  | F/SOct/SOct/SBrBzyl       | 1409                          |
| 88  | SPen/SPen/SPen/SBrBzyl    | 1409                          |
| 89  | F/GluAc/F/SPy             | 1409                          |
| 90  | F/XylAc/SPen/SPen         | 1414                          |
| 91  | SPy/SOct/SHex/SOct        | 1415                          |
| 92  | F/GluAc/F/SHex            | 1416                          |
| 93  | SPy/SPen/SPen/SBrBzyl     | 1416                          |
| 94  | F/XylAc/SPy/SPen          | 1421                          |
| 95  | SHex/SHex/SOct/SOct       | 1422                          |
| 96  | SPen/SPen/SHex/SBrBzyl    | 1423                          |
| 97  | SPy/SPy/SPen/SBrBzyl      | 1423                          |
| 98  | F/SPen/SBrBzyl/SBrBzyl    | 1424                          |
| 99  | F/XylAc/SPy/SPy           | 1428                          |
| 100 | F/SPen/XylAc/SHex         | 1428                          |
| 101 | F/XylAc/F/SBrBzyl         | 1429                          |
| 102 | SPy/SPen/SHex/SBrBzyl     | 1430                          |
| 103 | SPy/SPy/SPy/SBrBzyl       | 1430                          |
| 104 | F/SBrBzyl/SPy/SBrBzyl     | 1431                          |
| 105 | F/XylAc/SPy/SHex          | 1435                          |
| 106 | SPen/SOct/SOct/SOct       | 1436                          |
| 107 | SPen/SHex/SBrBzyl/SHex    | 1437                          |
| 108 | SPy/SHex/SPy/SBrBzyl      | 1437                          |
| 109 | F/SBrBzyl/SHex/SBrBzyl    | 1438                          |
| 110 | F/SHex/XylAc/SHex         | 1442                          |
| 111 | SPy/SOct/SOct/SOct        | 1443                          |
| 112 | SPy/SHex/SHex/SBrBzyl     | 1444                          |
| 113 | F/GluAc/F/SOct            | 1444                          |
| 114 | SHex/SOct/SOct/SOct       | 1450                          |
| 115 | SPen/SPen/SOct/SBrBzyl    | 1451                          |
| 116 | SHex/SHex/SHex/SBrBzyl    | 1451                          |
| 117 | F/SPen/XylAc/SOct         | 1456                          |
| 118 | SPy/SPen/SOct/SBrBzyl     | 1458                          |
| 119 | F/XylAc/SPy/SOct          | 1463                          |
| 120 | SPen/SHex/SOct/SBrBzyl    | 1465                          |
| 121 | SPy/SOct/SPy/SBrBzyl      | 1465                          |
| 122 | F/SOct/SBrBzyl/SBrBzyl    | 1466                          |
| 123 | F/XylAc/SOct/SHex         | 1470                          |
| 124 | SPy/SOct/SHex/SBrBzyl     | 1472                          |
| 125 | SOct/SOct/SOct/SOct       | 1478                          |
| 126 | SHex/SHex/SOct/SBrBzyl    | 1479                          |
| 127 | F/GluAc/SPen/SPen         | -only Cl adduct detected 1486 |
| 128 | SPen/SOct/SBrBzyl/SOct    | 1493                          |
| 129 | F/SPy/GluAc/SPen          | 1493                          |
| 130 | F/SOct/XylAc/SOct         | 1498                          |
| 131 | XylAc/SPen/SPen/SPen      | 1498                          |
| 132 | F/GluAc/SPy/SPy           | 1500                          |
| 133 | F/GluAc/SPen/SHex         | 1500                          |
| 134 | SPy/SOct/SOct/SBrBzyl     | 1500                          |
| 135 | F/GluAc/F/SBrBzyl         | 1501                          |
| 136 | XylAc/SPen/SPy/SPen       | 1505                          |
| 137 | F/SPy/GluAc/SHex          | 1507                          |
| 138 | SHex/SOct/SOct/SBrBzyl    | 1507                          |
| 139 | SPen/SBrBzyl/SPen/SBrBzyl | 1508                          |
| 140 | XylAc/SPy/SPen/SPy        | 1512                          |

|     |                              |      |
|-----|------------------------------|------|
| 141 | XylAc/SPen/SPen/SHex         | 1512 |
| 142 | F/SPen/XylAc/SBrBzyl         | 1513 |
| 143 | F/GluAc/SHex/SHex            | 1514 |
| 144 | SPy/SPen/SBrBzyl/SBrBzyl     | 1515 |
| 145 | F/F/XylAc/XylAc              | 1518 |
| 146 | XylAc/SPy/SHex/SPen          | 1519 |
| 147 | XylAc/SPy/SPy/SPy            | 1519 |
| 148 | F/SPy/XylAc/SBrBzyl          | 1520 |
| 149 | SPen/SBrBzyl/SHex/SBrBzyl    | 1522 |
| 150 | SPy/SPy/SBrBzyl/SBrBzyl      | 1522 |
| 151 | F/SBrBzyl/SBrBzyl/SBrBzyl    | 1523 |
| 152 | XylAc/SPen/SHex/SHex         | 1526 |
| 153 | XylAc/SPy/SPy/SHex           | 1526 |
| 154 | F/XylAc/SBrBzyl/SHex         | 1527 |
| 155 | F/SPen/GluAc/SOOct           | 1528 |
| 156 | SPy/SHex/SBrBzyl/SBrBzyl     | 1529 |
| 157 | XylAc/SHex/SPy/SHex          | 1533 |
| 158 | F/GluAc/SPy/SOOct            | 1535 |
| 159 | SOOct/SOOct/SOOct/SBrBzyl    | 1535 |
| 160 | SHex/SHex/SBrBzyl/SBrBzyl    | 1536 |
| 161 | XylAc/SHex/SHex/SHex         | 1540 |
| 162 | XylAc/SPen/SPen/SOOct        | 1540 |
| 163 | F/SHex/GluAc/SOOct           | 1542 |
| 164 | XylAc/SPen/SPy/SOOct         | 1547 |
| 165 | SPen/SOOct/SBrBzyl/SBrBzyl   | 1550 |
| 166 | XylAc/SPy/SOOct/SPy          | 1554 |
| 167 | XylAc/SPen/SOOct/SHex        | 1554 |
| 168 | F/XylAc/SOOct/SBrBzyl        | 1555 |
| 169 | SPy/SBrBzyl/SOOct/SBrBzyl    | 1557 |
| 170 | XylAc/SPy/SHex/SOOct         | 1561 |
| 171 | SHex/SOOct/SBrBzyl/SBrBzyl   | 1564 |
| 172 | XylAc/SHex/SOOct/SHex        | 1568 |
| 173 | GluAc/SPen/SPen/SPen         | 1570 |
| 174 | F/GluAc/SOOct/SOOct          | 1570 |
| 175 | GluAc/SPen/SPy/SPen          | 1577 |
| 176 | XylAc/SOOct/SPen/SOOct       | 1582 |
| 177 | GluAc/SPy/SPen/SPy           | 1584 |
| 178 | GluAc/SPen/SPen/SHex         | 1584 |
| 179 | F/GluAc/SBrBzyl/SPen         | 1585 |
| 180 | XylAc/SPy/SOOct/SOOct        | 1589 |
| 181 | F/GluAc/F/XylAc              | 1590 |
| 182 | GluAc/SPy/SHex/SPen          | 1591 |
| 183 | GluAc/SPy/SPy/SPy            | 1591 |
| 184 | F/GluAc/SPy/SBrBzyl          | 1592 |
| 185 | SOOct/SOOct/SBrBzyl/SBrBzyl  | 1592 |
| 186 | XylAc/SOOct/SHex/SOOct       | 1596 |
| 187 | XylAc/SPen/SPen/SBrBzyl      | 1597 |
| 188 | GluAc/SPy/SPy/SHex           | 1598 |
| 189 | GluAc/SPen/SHex/SHex         | 1598 |
| 190 | F/GluAc/SBrBzyl/SHex         | 1599 |
| 191 | F/XylAc/SPen/XylAc           | 1602 |
| 192 | XylAc/SPen/SPy/SBrBzyl       | 1604 |
| 193 | GluAc/SPy/SHex/SHex          | 1605 |
| 194 | SPen/SBrBzyl/SBrBzyl/SBrBzyl | 1607 |
| 195 | F/XylAc/SPy/XylAc            | 1609 |
| 196 | XylAc/SPen/SBrBzyl/SHex      | 1611 |
| 197 | XylAc/SPy/SBrBzyl/SPy        | 1611 |
| 198 | F/SBrBzyl/XylAc/SBrBzyl      | 1612 |
| 199 | GluAc/SPen/SOOct/SPen        | 1612 |

|     |                                 |                                |
|-----|---------------------------------|--------------------------------|
| 200 | GluAc/SHex/SHex/SHex            | 1612                           |
| 201 | SPy/SBrBzyl/SBrBzyl/SBrBzyl     | 1614                           |
| 202 | F/XylAc/SHex/XylAc              | 1616                           |
| 203 | XylAc/SPy/SHex/SBrBzyl          | 1618                           |
| 204 | GluAc/SPy/SOOct/SPen            | 1619                           |
| 205 | SHex/SBrBzyl/SBrBzyl/SBrBzyl    | 1621                           |
| 206 | XylAc/SOOct/SOOct/SOOct         | 1624                           |
| 207 | XylAc/SHex/SHex/SBrBzyl         | 1625                           |
| 208 | GluAc/SHex/SPen/SOOct           | 1626                           |
| 209 | GluAc/SPy/SOOct/SPy             | 1626                           |
| 210 | F/GluAc/SBrBzyl/SOOct           | 1627                           |
| 211 | GluAc/SHex/SPy/SOOct            | 1633                           |
| 212 | XylAc/SPen/SOOct/SBrBzyl        | 1639                           |
| 213 | GluAc/SHex/SHex/SOOct           | 1640                           |
| 214 | F/XylAc/XylAc/SOOct             | 1644                           |
| 215 | XylAc/SOOct/SPy/SBrBzyl         | 1646                           |
| 216 | SOOct/SBrBzyl/SBrBzyl/SBrBzyl   | 1649                           |
| 217 | XylAc/SHex/SBrBzyl/SOOct        | 1653                           |
| 218 | GluAc/SOOct/SPen/SOOct          | 1654                           |
| 219 | GluAc/SPy/SOOct/SOOct           | 1661                           |
| 220 | F/F/GluAc/GluAc                 | 1662                           |
| 221 | GluAc/SOOct/SHex/SOOct          | 1668                           |
| 222 | GluAc/SPen/SPen/SBrBzyl         | 1669                           |
| 223 | F/GluAc/XylAc/SPen              | 1674                           |
| 224 | GluAc/SPy/SPen/SBrBzyl          | 1676                           |
| 225 | XylAc/SOOct/SBrBzyl/SOOct       | 1681                           |
| 226 | F/GluAc/SPy/XylAc               | 1681                           |
| 227 | GluAc/SPy/SPy/SBrBzyl           | 1683                           |
| 228 | GluAc/SPen/SBrBzyl/SHex         | 1683                           |
| 229 | F/GluAc/SBrBzyl/SBrBzyl         | 1684                           |
| 230 | XylAc/SPen/XylAc/SPen           | 1686                           |
| 231 | F/XylAc/GluAc/SHex              | 1688                           |
| 232 | GluAc/SHex/SPy/SBrBzyl          | 1690                           |
| 233 | XylAc/XylAc/SPy/SPen            | 1693                           |
| 234 | XylAc/SBrBzyl/SPen/SBrBzyl      | 1696                           |
| 235 | GluAc/SOOct/SOOct/SOOct         | 1696                           |
| 236 | GluAc/SHex/SBrBzyl/SHex         | 1697                           |
| 237 | XylAc/SPen/XylAc/SHex           | 1700                           |
| 238 | XylAc/SPy/XylAc/SPy             | 1700                           |
| 239 | F/XylAc/SBrBzyl/XylAc           | 1701                           |
| 240 | XylAc/SPy/SBrBzyl/SBrBzyl       | 1703                           |
| 241 | SBrBzyl/SBrBzyl/SBrBzyl/SBrBzyl | 1706                           |
| 242 | XylAc/XylAc/SPy/SHex            | 1707                           |
| 243 | XylAc/SHex/SBrBzyl/SBrBzyl      | 1710                           |
| 244 | GluAc/SPen/SOOct/SBrBzyl        | 1711                           |
| 245 | XylAc/SHex/XylAc/SHex           | 1714                           |
| 246 | F/GluAc/SOOct/XylAc             | 1716                           |
| 247 | GluAc/SPy/SBrBzyl/SOOct         | 1718                           |
| 248 | GluAc/SHex/SOOct/SBrBzyl        | 1725                           |
| 249 | XylAc/XylAc/SPen/SOOct          | 1728                           |
| 250 | XylAc/XylAc/SPy/SOOct           | 1735                           |
| 251 | XylAc/SOOct/SBrBzyl/SBrBzyl     | 1738                           |
| 252 | XylAc/SHex/XylAc/SOOct          | 1742                           |
| 253 | F/GluAc/GluAc/SPen              | - only Na adduct detected 1746 |
| 254 | F/GluAc/SPy/GluAc               | 1753                           |



|     |                               |                           |      |
|-----|-------------------------------|---------------------------|------|
| 255 | GluAc/SOct/SOct/SBrBzyl       |                           | 1753 |
| 256 | GluAc/XylAc/SPen/SPen         |                           | 1758 |
| 257 | F/GluAc/GluAc/SHex            |                           | 1760 |
| 258 | GluAc/XylAc/SPen/SPy          |                           | 1765 |
| 259 | GluAc/SPen/SBrBzyl/SBrBzyl    |                           | 1768 |
| 260 | XylAc/XylAc/SOct/SOct         |                           | 1770 |
| 261 | GluAc/XylAc/SPen/SHex         |                           | 1772 |
| 262 | GluAc/SPy/XylAc/SPy           |                           | 1772 |
| 263 | F/GluAc/SBrBzyl/XylAc         |                           | 1773 |
| 264 | GluAc/SBrBzyl/SPy/SBrBzyl     |                           | 1775 |
| 265 | GluAc/XylAc/SPy/SHex          |                           | 1779 |
| 266 | GluAc/SHex/SBrBzyl/SBrBzyl    |                           | 1782 |
| 267 | XylAc/XylAc/SPen/SBrBzyl      |                           | 1785 |
| 268 | GluAc/SHex/XylAc/SHex         |                           | 1786 |
| 269 | F/GluAc/SOct/GluAc            |                           | 1788 |
| 270 | F/XylAc/XylAc/XylAc           |                           | 1790 |
| 271 | XylAc/SPy/XylAc/SBrBzyl       |                           | 1792 |
| 272 | XylAc/SBrBzyl/SBrBzyl/SBrBzyl |                           | 1795 |
| 273 | XylAc/SHex/XylAc/SBrBzyl      |                           | 1799 |
| 274 | GluAc/SPen/XylAc/SOct         | -only K adduct detected   | 1800 |
| 275 | GluAc/XylAc/SPy/SOct          |                           | 1807 |
| 276 | GluAc/SBrBzyl/SOct/SBrBzyl    |                           | 1810 |
| 277 | GluAc/XylAc/SHex/SOct         |                           | 1814 |
| 278 | XylAc/SOct/XylAc/SBrBzyl      |                           | 1827 |
| 279 | GluAc/SPen/GluAc/SPen         | -only Cl adduct detected  | 1830 |
| 280 | GluAc/SPy/GluAc/SPen          |                           | 1837 |
| 281 | GluAc/SOct/XylAc/SOct         |                           | 1842 |
| 282 | GluAc/GluAc/SPy/SPy           |                           | 1844 |
| 283 | GluAc/SPen/GluAc/SHex         |                           | 1844 |
| 284 | F/GluAc/GluAc/SBrBzyl         |                           | 1845 |
| 285 | GluAc/SPy/GluAc/SHex          |                           | 1851 |
| 286 | GluAc/SPen/XylAc/SBrBzyl      |                           | 1857 |
| 287 | GluAc/SHex/GluAc/SHex         |                           | 1858 |
| 288 | F/XylAc/GluAc/XylAc           |                           | 1862 |
| 289 | GluAc/XylAc/SBrBzyl/SPy       |                           | 1864 |
| 290 | GluAc/SBrBzyl/SBrBzyl/SBrBzyl |                           | 1867 |
| 291 | GluAc/SHex/XylAc/SBrBzyl      |                           | 1871 |
| 292 | GluAc/GluAc/SPen/SOct         |                           | 1872 |
| 293 | XylAc/XylAc/XylAc/SPen        |                           | 1874 |
| 294 | GluAc/GluAc/SPy/SOct          |                           | 1879 |
| 295 | XylAc/XylAc/XylAc/SPy         |                           | 1881 |
| 296 | XylAc/SBrBzyl/XylAc/SBrBzyl   |                           | 1884 |
| 297 | GluAc/SHex/GluAc/SOct         |                           | 1886 |
| 298 | XylAc/XylAc/XylAc/SHex        |                           | 1888 |
| 299 | GluAc/XylAc/SOct/SBrBzyl      |                           | 1899 |
| 300 | GluAc/SOct/GluAc/SOct         |                           | 1914 |
| 301 | XylAc/XylAc/XylAc/SOct        |                           | 1916 |
| 302 | GluAc/SPen/GluAc/SBrBzyl      | - only Na adduct detected | 1929 |
| 303 | F/GluAc/XylAc/GluAc           |                           | 1934 |
| 304 | GluAc/SPy/GluAc/SBrBzyl       |                           | 1936 |
| 305 | GluAc/SHex/GluAc/SBrBzyl      |                           | 1943 |
| 306 | GluAc/XylAc/XylAc/SPen        |                           | 1946 |
| 307 | GluAc/XylAc/XylAc/SPy         |                           | 1953 |
| 308 | GluAc/XylAc/SBrBzyl/SBrBzyl   |                           | 1956 |
| 309 | GluAc/XylAc/SHex/XylAc        |                           | 1960 |
| 310 | GluAc/SOct/GluAc/SBrBzyl      |                           | 1971 |

|     |                                                      |      |
|-----|------------------------------------------------------|------|
| 311 | XylAc/XylAc/XylAc/SBrBzyl                            | 1973 |
| 312 | GluAc/XylAc/XylAc/SOct                               | 1988 |
| 313 | F/GluAc/GluAc/GluAc - only Na adduct detected        | 2006 |
| 314 | GluAc/XylAc/GluAc/SPen                               | 2018 |
| 315 | GluAc/GluAc/XylAc/SPy                                | 2025 |
| 316 | GluAc/GluAc/SBrBzyl/SBrBzyl                          | 2028 |
| 317 | GluAc/GluAc/XylAc/SHex                               | 2032 |
| 318 | GluAc/XylAc/XylAc/SBrBzyl                            | 2045 |
| 319 | GluAc/GluAc/XylAc/SOct                               | 2060 |
| 320 | XylAc/XylAc/XylAc/XylAc                              | 2062 |
| 321 | GluAc/GluAc/GluAc/SPen -only formate adduct detected | 2090 |
| 322 | GluAc/GluAc/GluAc/SPy                                | 2097 |
| 323 | GluAc/GluAc/GluAc/SHex - only Cl adduct detected     | 2104 |
| 324 | GluAc/XylAc/GluAc/SBrBzyl                            | 2117 |
| 325 | GluAc/GluAc/GluAc/SOct                               | 2132 |
| 326 | GluAc/XylAc/XylAc/XylAc                              | 2134 |
| 327 | GluAc/GluAc/GluAc/SBrBzyl                            | 2189 |
| 328 | GluAc/XylAc/GluAc/XylAc                              | 2206 |
| 329 | GluAc/GluAc/GluAc/XylAc                              | 2278 |
| 330 | GluAc/GluAc/GluAc/GluAc                              | 2350 |

**Table ESI-2.** Abundance of each compound in core-centered libraries is not equivalent; for the 21-member library L-1.

| R                     | % in library | % of cis-isomer | % of trans-isomer |
|-----------------------|--------------|-----------------|-------------------|
| Py / Py / Py / Py     | 1.23         | /               | /                 |
| Py / Py / Py / Xyl    | 4.94         | /               | /                 |
| Py / Py / Py / Glu    | 4.94         | /               | /                 |
| Py / Py / Xyl / Xyl   | 7.41         | 4.94            | 2.47              |
| Py / Py / Glu / Xyl   | 14.81        | 9.88            | 4.94              |
| Py / Py / Glu / Glu   | 7.41         | 4.94            | 2.47              |
| Py / Xyl / Xyl / Xyl  | 4.94         | /               | /                 |
| Py / Glu / Xyl / Xyl  | 14.81        | 9.88            | 4.94              |
| Py / Glu / Glu / Xyl  | 14.81        | 9.88            | 4.94              |
| Xyl / Xyl / Xyl / Xyl | 1.23         | /               | /                 |
| Py / Glu / Glu / Glu  | 4.94         | /               | /                 |
| Glu / Xyl / Xyl / Xyl | 4.94         | /               | /                 |
| Glu / Glu / Xyl / Xyl | 7.41         | 4.94            | 2.47              |
| Glu / Glu / Glu / Xyl | 4.94         | /               | /                 |
| Glu / Glu / Glu / Glu | 1.23         | /               | /                 |

## Mass Spectrometry of Corrole Libraries: L4 and L5

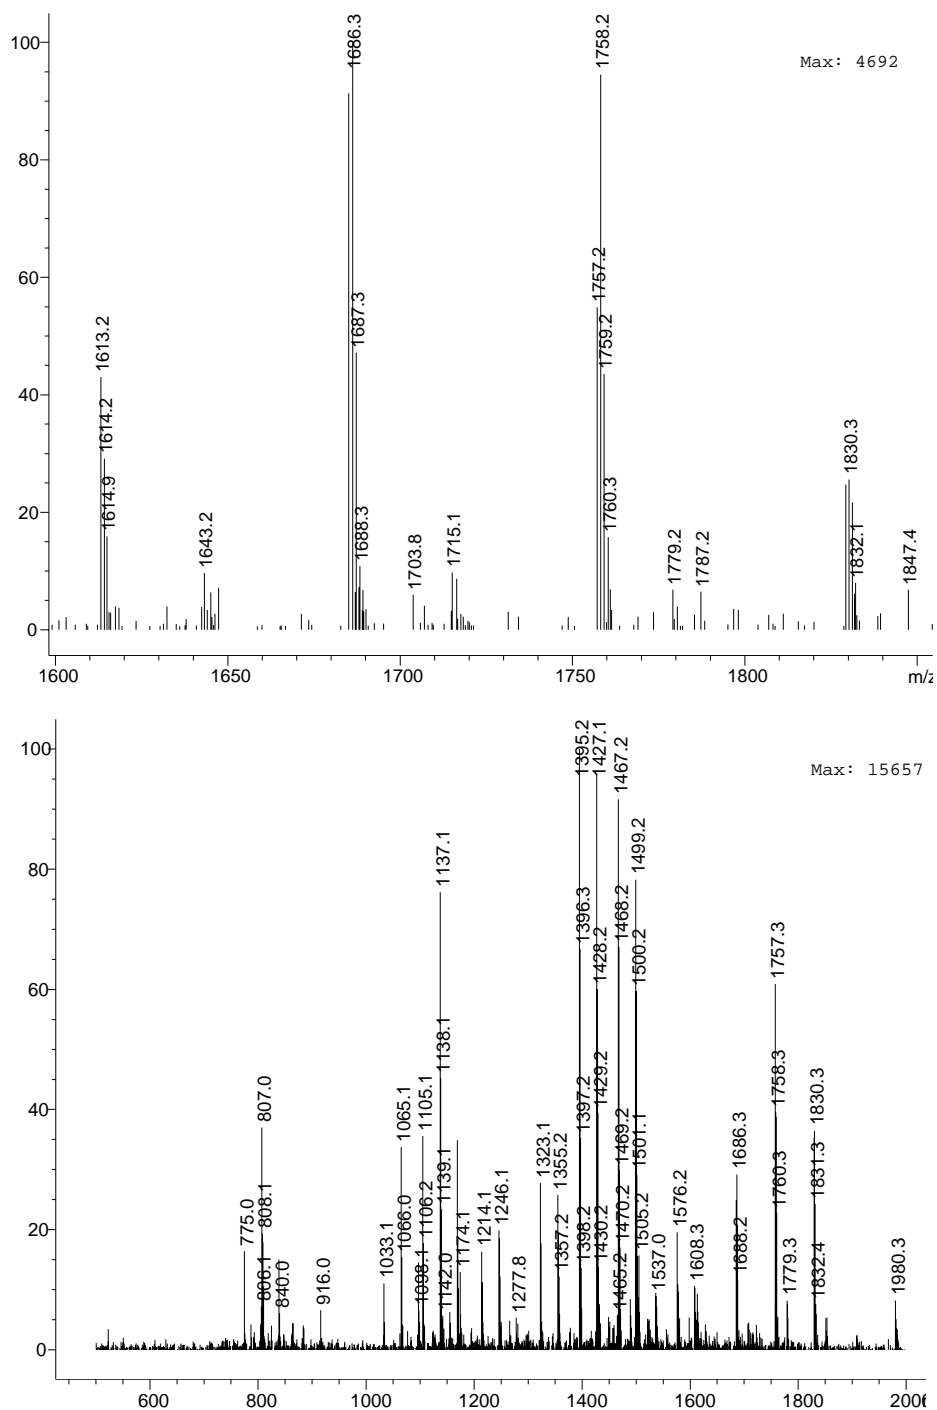

**Figure ESI-17:** ESI-MS of corrole libraries using (A) only glucose and xylose thioacetates where six compounds are expected, and (B) the two thiosugars as well as thio pyridine as the nucleophiles, where 18 compounds are expected. Since the isomers have the same molecular weights, the number of isobaric compounds for the library in A is four, and for the library in B is 10.

**Table ESI-3.** Possible compounds for the corrole libraries*GluAc/XylAc with possible incomplete substitution of the F*

| Compound # | Substituents                                  | m/z  |
|------------|-----------------------------------------------|------|
| 1          | F/F/F                                         | 796  |
| 2/3        | XylAc/F/F, F/XylAc/F                          | 1068 |
| 4/5        | GluAc/F/F, F/GluAc/F                          | 1140 |
| 6/7        | XylAc/XylAc/F, XylAc/F/XylAc                  | 1340 |
| 8/9/10     | GluAc/XylAc/F, GluAc/F/XylAc<br>F/GluAc/XylAc | 1412 |
| 11/12      | GluAc/GluAc/F, GluAc/F/GluAc                  | 1484 |
| 13         | XylAc/XylAc/XylAc                             | 1612 |
| 14/15      | GluAc/XylAc/XylAc, XylAc/GluAc/XylAc          | 1684 |
| 16/17      | GluAc/GluAc/XylAc, GluAc/XylAc/GluAc          | 1756 |
| 18         | GluAc/GluAc/GluAc                             | 1828 |

The highlighted compounds were found in the MS analysis, thus indicating that the target 6-member library was synthesized with reasonable yield.

**Table ESI-4.** *GluAc/XylAc and SPy with possible incomplete substitution of the F*

| Compound # | Substituents                                      | m/z  |
|------------|---------------------------------------------------|------|
| 1          | F/F/F/                                            | 796  |
| 2/3        | SPy/F/F, F/SPy/F                                  | 887  |
| 4/5        | SPy/SPy/F, SPy/F/SPy                              | 978  |
| 6/7        | XylAc/F/F, F/XylAc/F                              | 1068 |
| 8          | SPy/SPy/SPy                                       | 1069 |
| 9/10       | GluAc/F/F, F/ GluAc/F                             | 1140 |
| 11/12/13   | XylAc/SPy/F, XylAc/F/SPy, F/XylAc/SPy             | 1159 |
| 14/15/16   | GluAc/SPy/F, GluAc/F/SPy, F/GluAc/SPy             | 1231 |
| 17/18      | XylAc/SPy/SPy, SPy/XylAc/SPy                      | 1250 |
| 19/20      | GluAc/SPy/SPy, SPy/GluAc/SPy                      | 1322 |
| 21/22      | XylAc/XylAc/F, XylAc/F/XylAc                      | 1340 |
| 23/24/25   | GluAc/XylAc/F, GluAc/F/XylAc, F/GluAc/XylAc       | 1412 |
| 26/27      | XylAc/XylAc/SPy, XylAc/SPy/XylAc                  | 1431 |
| 28/29      | GluAc/GluAc/F, GluAc/F/GluAc                      | 1484 |
| 30/31/32   | GluAc/XylAc/SPy, GluAc/SPy/XylAc, XylAc/GluAc/SPy | 1503 |
| 33/34      | GluAc/GluAc/SPy, GluAc/SPy/GluAc                  | 1575 |
| 35         | XylAc/XylAc/XylAc                                 | 1612 |
| 36/37      | GluAc/XylAc/XylAc, XylAc/GluAc/XylAc              | 1684 |
| 38/39      | GluAc/GluAc/XylAc, GluAc/XylAc/GluAc              | 1756 |
| 40         | GluAc/GluAc/GluAc                                 | 1828 |

The highlighted compounds were found in the MS analysis, thus indicating that 17 members of the target 18-member library were synthesized and the SPy moiety is less reactive than the thiosugars.

## Cell Binding Assays

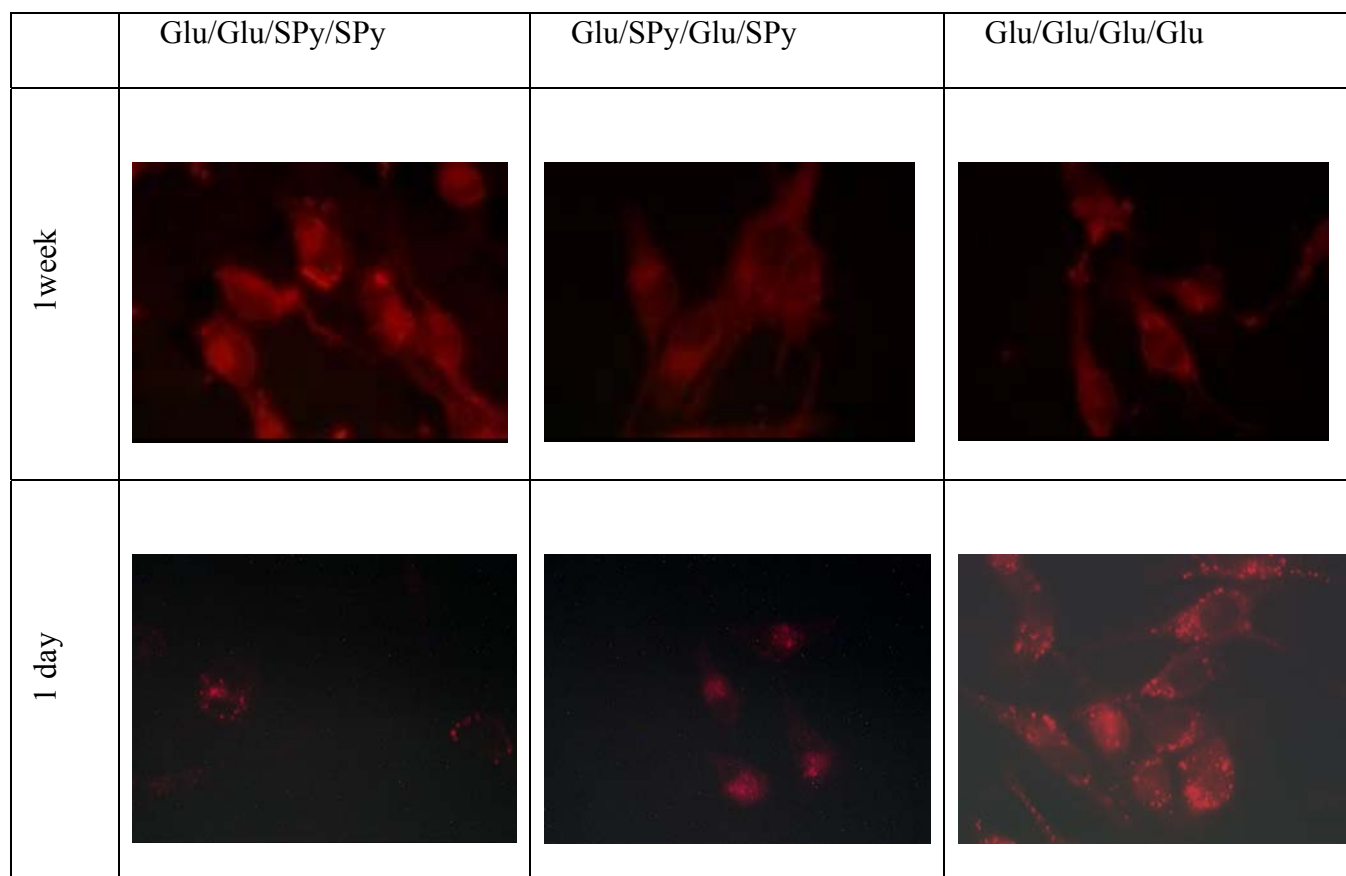

**Figure ESI-18.** Different affinities of winning Glu<sub>2</sub>SPy<sub>2</sub> isomers toward human breast cancer MDA-MB-231 cells assayed by fluorescence images and compared with the Glu/Glu/Glu/Glu porphyrin (10  $\mu$ M incubated with cells followed by rinsing and fixing the cells). Magnification = 60X.

## Experimental

### *FLim program:*

This Java-based program is for handling (FL)uorescence (im)ages of cells that have been tagged with some kind of fluorescence probe. It allows for the relative fluorescence intensity between images to be quickly compared. The program opens images in jpg, png, or gif format, and only saves in jpg format. One of the basic functions that it performs is background subtraction. This is performed by selecting a rectangular region, then pressing "BG Color" to set it, followed by "Run" to execute that function.

Relative intensities are computed using a pixel sampling method, in which the weighted average of the most intense pixels (based on the red, green, or blue value) within a specific range. If no errors occurred during the calculation process, then the error label displays "none", however, if it says "under sampled" then not enough pixels were sampled. This can be solved by either reducing the

pixels to sample, or adjusting the range. The distribution of pixels can also be evaluated. A good distribution is one in which the minimum intensity is greater than the lower limit of the range, and the maximum is less than the upper limit of the range. The distribution of intensities also shows which image has the most intense fluorescence. When comparing images, it is important that the same range of parameters including the number of pixels sampled be used for all images. Another important point to make is that the program scans an entire image, rather than looks at a selected section/region of that image. By doing this, it gives a more accurate intensity calculation.

### **Uptake of amphipathic uncharged porphyrins: isomers and aggregation**

Cells cultured on glass cover slips, using the same conditions reported previously, were incubated with 10  $\mu\text{M}$  of the three porphyrin derivatives under identical conditions. After rinsing the unbound compounds from the cells on the cover slips and fixing the cells, fluorescence images of the cells were taken on the same day of fixing and one week later. The observed fluorescence intensity was taken to be proportional to the quantity of porphyrin bound to the cells, and was quantified by comparing the integrated RGB vectors for identical areas (see experimental procedures). When cells are treated with the uncharged 5,10-isomer (Glu/Glu/Py/Py) or the 5,-15-isomer (Glu/Py/Glu/Py) for 24 hours, rinsed, and fixed, little fluorescence is observed by fluorescence microscopy just after fixing the cells compared to the bright luminescence of cells treated with Glu/Glu/Glu/Glu. However, when the same slides bearing the cells are re-examined one week later, the fluorescence micrographs show a large increase in luminescence (Figure ESI-18). Since the cells were rinsed to remove unbound porphyrins, no further uptake of porphyrin is possible. Thus the images in Figure ESI-18 clearly show that the affinity of Glu/Glu/SPy/SPy to the cancer cells is 2-3 fold greater than the affinity of Glu/SPy/Glu/SPy.

These results suggest that Glu/Glu/SPy/SPy and Glu/SPy/Glu/SPy bind and/or enter the cells as nanoscaled aggregates, which have significantly quenched fluorescence. The UV-VIS spectra of both isomers in polar organic solvents (e.g. 1:1  $\text{CH}_3\text{OH}/\text{DME}$ , Figure ESI-19, DME is ethylene glycol dimethyl ether) are typical of porphyrin derivatives based on TPPF<sub>20</sub>. The Soret bands of the electronic spectra of both compounds in the DMEM cell culture media (without phenol red) are significantly broadened and split, which is typical of aggregated porphyrins. Dynamic light scattering (DLS) of freshly prepared 10  $\mu\text{M}$  aqueous solutions of Glu/Glu/SPy/SPy and Glu/SPy/Glu/SPy indicates the average particle diameters are 30 nm and 50 nm respectively, but the dispersities are large. The absorption of nanoparticles by cells has been well documented.<sup>2-11</sup> Thus it is reasonable to hypothesize that nanoparticles/aggregates of Glu/Glu/SPy/SPy or Glu/SPy/Glu/SPy are formed in the cell culture medium wherein their fluorescence is quenched by well-understood mechanisms.<sup>12-14,15</sup> Once absorbed by the cells, the nanoparticles slowly deaggregate due to interactions with various cellular components, which are manifested by the observed increase in fluorescence intensity (compare 1 day to 1 week in Figure ESI-18). The mechanism of nanoparticle uptake was not specifically evaluated, but may involve endocytosis and/or binding to cell membranes and nanoparticles reorganization. Also the cells may take up smaller nanoparticles preferentially.

The working model for the difference in uptake is that Glu/Glu/SPy/SPy is polar and has a hydrophilic side and a hydrophobic side, thus partitions into the cell membrane better than compound Glu/SPy/Glu/SPy, which is consistent with previous studies comparing these types of isomers.<sup>16</sup> The hierarchical organization and stability of porphyrinic nanoparticles are known to be highly dependent on the chemical structure.<sup>17, 18</sup>

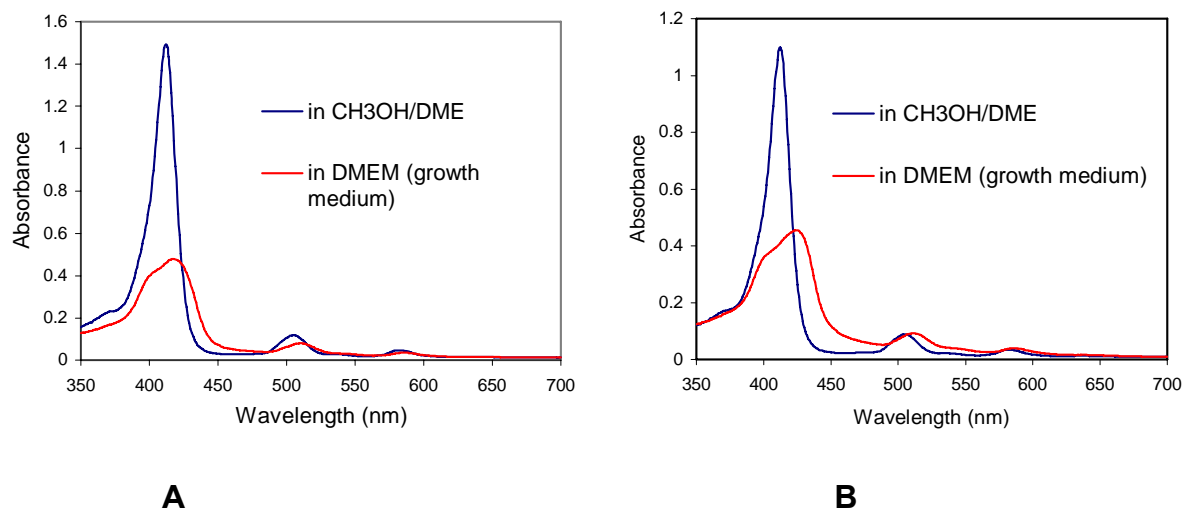

**Figure ESI-19.** The UV-VIS spectra of (A) Glu/Glu/SPy/SPy and (B) Glu/SPy/Glu/SPy in an organic solvent mixture of CH<sub>3</sub>OH/DME (1:1 v/v) and aqueous growth medium DMEM without phenol red. The broadened and red-shifted Soret bands are indicative of aggregation.



**Derivatives with the pyridyl and pyridinium directly attached to the porphyrin**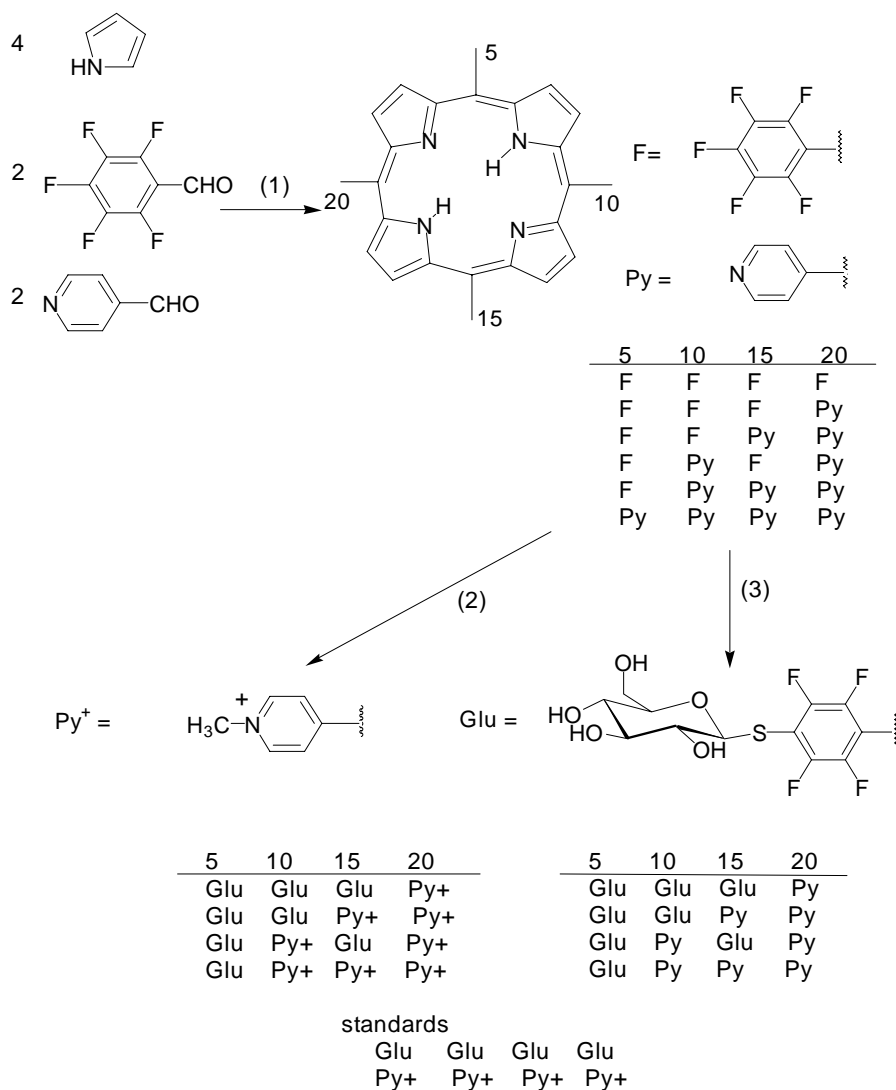

**Scheme ESI-4:** Top: general reaction scheme for a typical mixed aryl aldehyde porphyrin synthesis (1) uses a 2:1:1 ratio of pyrrole: pyridinecarboxaldehyde: pentafluorobenzaldehyde in refluxing propionic acid, which yields six isomers.<sup>1</sup> After chromatographic separation of the desired compounds, (2) the formation of the N-methyl pyridinium salt uses an excess of CH<sub>3</sub>I in CH<sub>2</sub>Cl<sub>2</sub> and, (3) the substitution of the 4-fluoro group uses the protected thioglucose in CH<sub>3</sub>OH/DMF/CHCl<sub>3</sub> at room temperature with diethylamine followed by deprotection with four equivalents of NaOCH<sub>3</sub> in CH<sub>3</sub>OH/CH<sub>2</sub>Cl<sub>2</sub>

The reactivity of the pentafluorophenyl group is similar to the parent TPPF<sub>20</sub>. For example, the protected thioglucose is readily appended to 5,10-di-(pentafluorophenyl)-15,20-di-(pyridin-4-

yl)porphyrin (F/F/Py/Py); and 5,15-di-(pentafluorophenyl)-10,20-di-(pyridin-4-yl)porphyrin (F/Py/F/Py), using 4 equivalents of the thioglucose in a 4:4:1 (v/v) mixture of DMF/chloroform/methanol as the solvent, while stirring at RT under N<sub>2</sub> for one day to yield the sugar appended porphyrin with more than 80% isolated yields. The quaternisation of the pyridyl functions of the porphyrins were carried out by reaction with CH<sub>3</sub>I followed by anion exchange by Cl<sup>-</sup> using Amberlite resin. Deprotection of the protected thioglucose was then carried out as usual with stoichiometric amount NaOCH<sub>3</sub>.

**Table ESI-5.** Yields of substitution reactions on mixed aryl pentafluorophenyl, pyridyl porphyrins<sup>a</sup>.

| Porphyrin Product |       |       |       | Thio reagent                               | Solvent                                           | Rxn. time | Yield (%) |
|-------------------|-------|-------|-------|--------------------------------------------|---------------------------------------------------|-----------|-----------|
| 5                 | 10    | 15    | 20    |                                            |                                                   |           |           |
| Py                | Py    | GluAc | GluAc | 2,3,4,6-tetra-O-acetyl-glucosylthioacetate | DMF:CHCl <sub>3</sub> :CH <sub>3</sub> OH (4:4:1) | 1 day     | 82        |
| Py                | GluAc | Py    | GluAc | 2,3,4,6-tetra-O-acetyl-glucosylthioacetate | DMF:CHCl <sub>3</sub> :CH <sub>3</sub> OH (4:4:1) | 1 day     | 84        |
| Py                | GluAc | GluAc | GluAc | 2,3,4,6-tetra-O-acetyl-glucosylthioacetate | DMF:CHCl <sub>3</sub> :CH <sub>3</sub> OH (4:4:1) | 1 day     | 83        |
| Py                | Py    | Py    | GluAc | 2,3,4,6-tetra-O-acetyl-glucosylthioacetate | DMF:CHCl <sub>3</sub> :CH <sub>3</sub> OH (4:4:1) | 1 day     | 90        |

<sup>a</sup>Reactions are run under an inert atmosphere, 20 equivalents DEA, magnetic stirring

## Optical properties

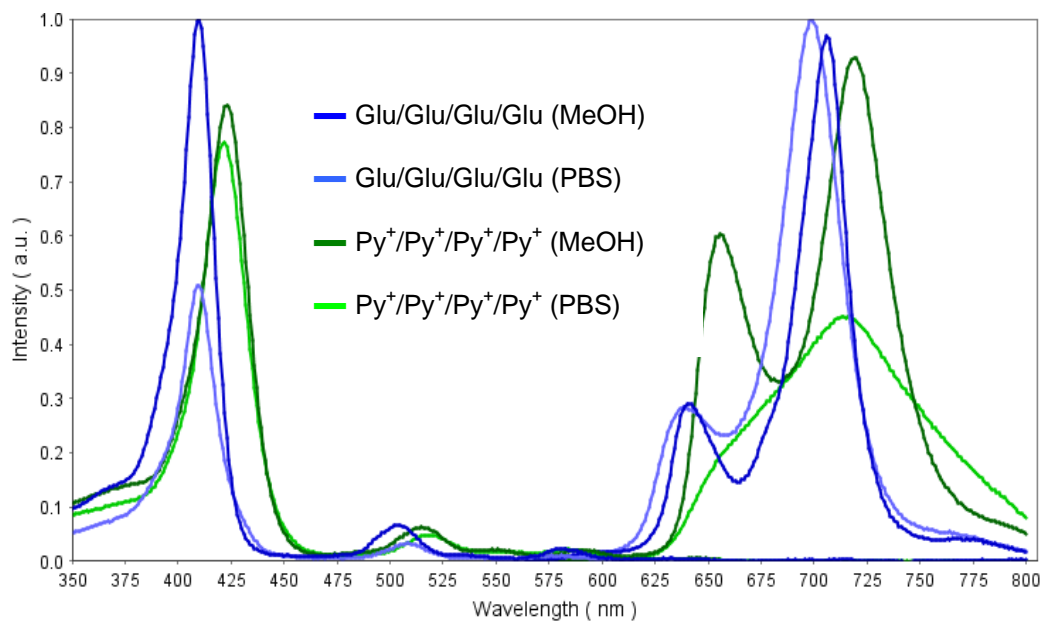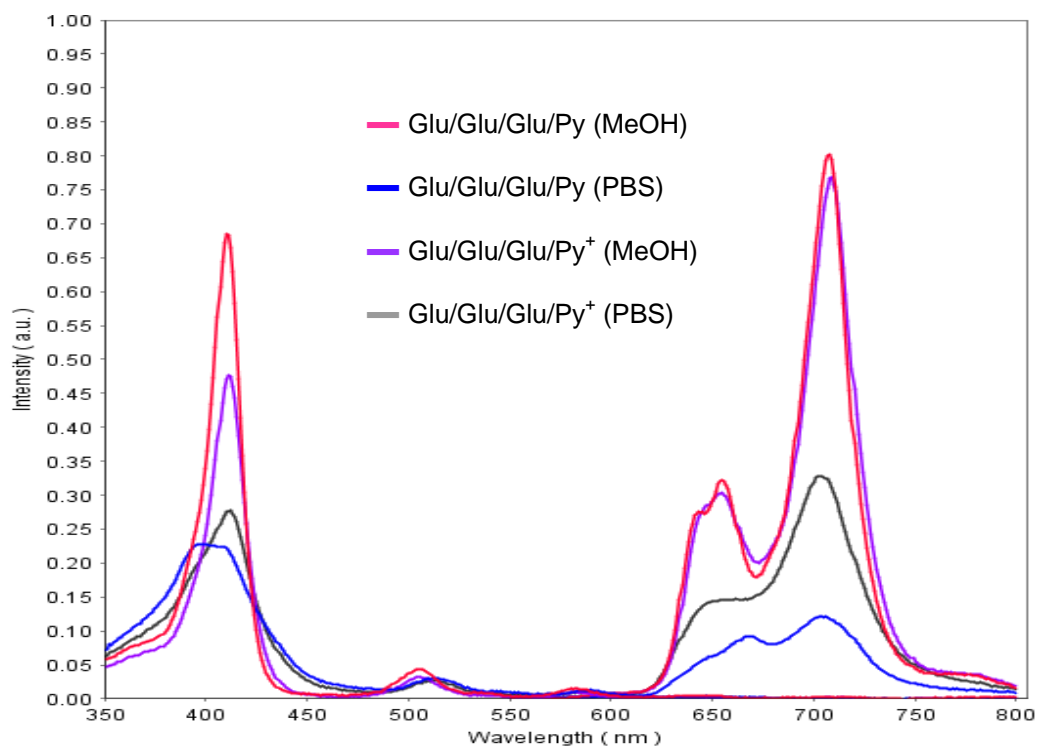

**Figure ESI-20:** Overlay plots of absorption (left) and emission (right) spectra for the mixed aryl pyridyl porphyrins (structures in Scheme ESI-4), ca. 2.5  $\mu$ M in methanol and aqueous PBS cell culture media.

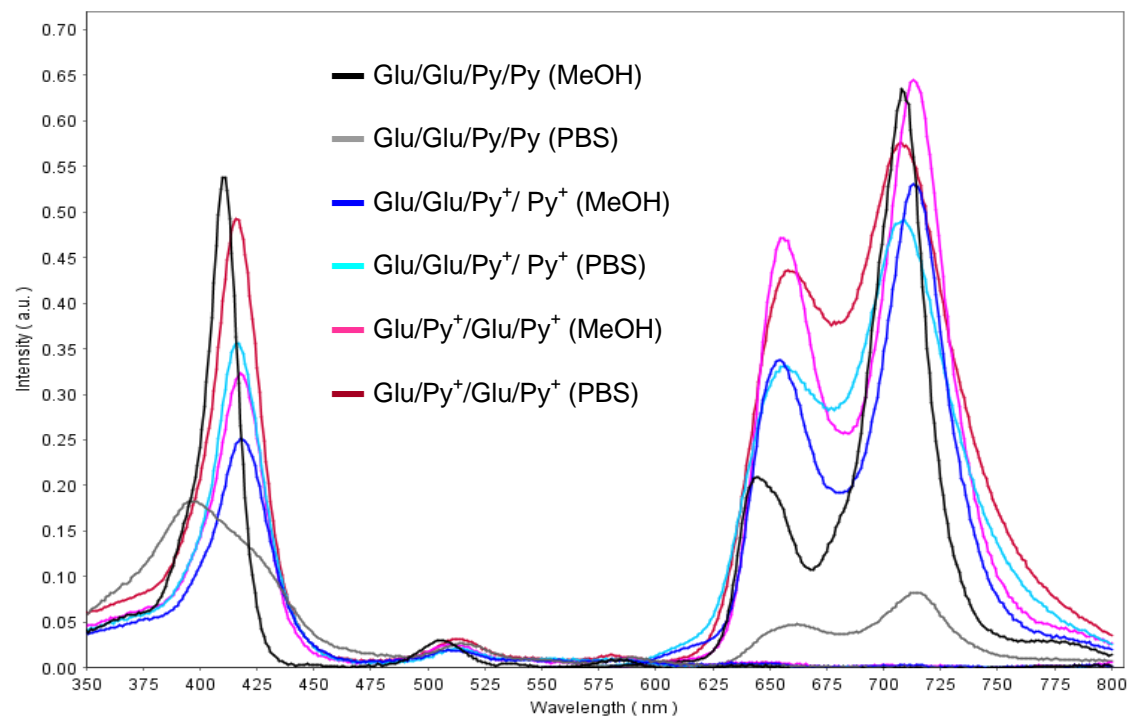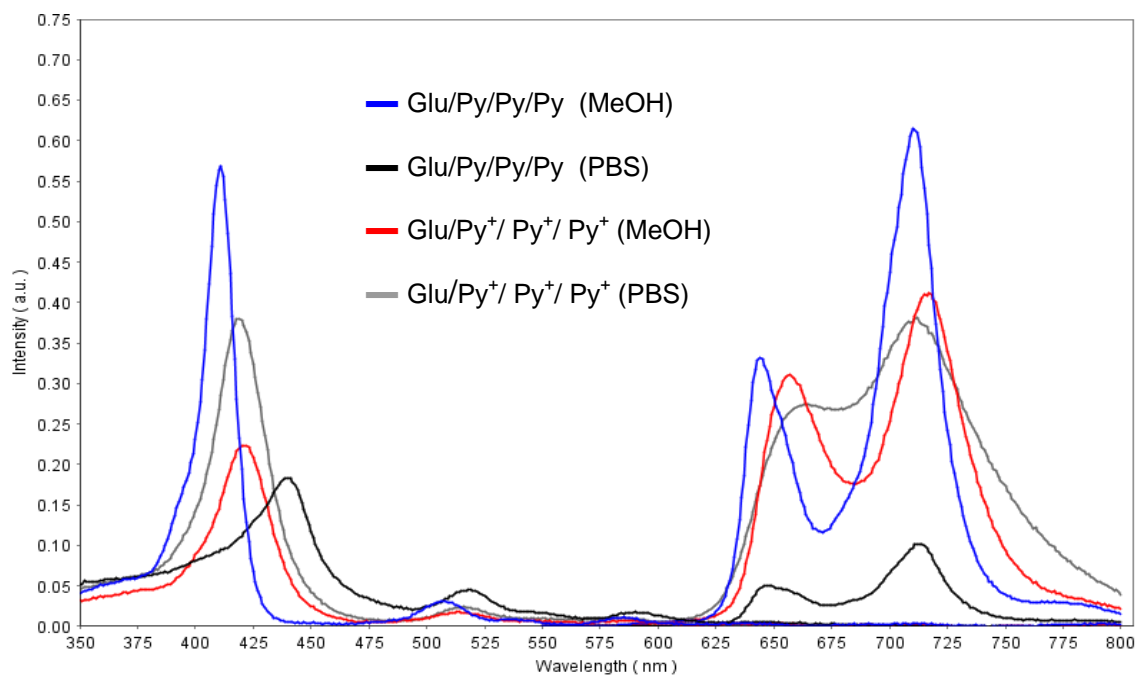

**Figure ESI-21:** Overlay plots of absorption (left) and emission (right) spectra for the mixed aryl pyridyl porphyrins (structures in Scheme ESI-4), ca. 2.5  $\mu$ M in methanol and aqueous PBS cell culture media.

The triplet quantum yield for TPP is  $80\% \pm 10\%$ , and for TPPF<sub>20</sub> is  $>80\%$ .<sup>19</sup> The fluorescence quantum yields of these mixed aryl derivatives in methanol and PBS is shown in Table ESI-6. Because these are measured indirectly using a known standard compound, it should be noted that these values may have some systematic error; however all experiments were performed on the same day and using identical concentrations to minimize any experimental errors.

### *Quantum Yield Calculations*

From the normalized absorption and corrected emission spectra, the quantum yield for radiative decay can be indirectly obtained using the following equation from George et al.<sup>20</sup> In this equation,  $Q$  is the quantum yield of the unknown sample;  $Q_R$  is the quantum yield ( $\Phi_F$ ) of the standard sample,  $I_R$  and  $I$  are the integrated intensity for the standard and unknown samples, respectively.  $OD$  represents the optical density and  $\eta$  is the refractive index of the solvent used. The standard or reference sample used for the quantum yield determination was cresyl violet ( $\Phi_F = 0.54$ , spectral range 600 – 650 nm) dissolved in methanol.<sup>21, 22</sup>

$$Q = Q_R \frac{I}{I_R} \frac{OD_R}{OD} \frac{n^2}{n_R^2}$$

|                                                                    | Quantum Yield |     |
|--------------------------------------------------------------------|---------------|-----|
|                                                                    | MeOH          | PBS |
| Cresyl Violet                                                      | 54%           |     |
| Glu/Glu/Glu/Glu                                                    | 7%            | 7%  |
| Py/Glu/Glu/Glu                                                     | 9%            | 3%  |
| Py/Py/Glu/ Glu                                                     | 9%            | 3%  |
| Py/Py/Py/Glu                                                       | 9%            | 3%  |
| Py <sup>+</sup> /Glu/Glu/Glu                                       | 10%           | 7%  |
| Py <sup>+</sup> /Py <sup>+</sup> /Glu/Glu                          | 10%           | 8%  |
| Py <sup>+</sup> /Glu/Py <sup>+</sup> /Glu                          | 10%           | 7%  |
| Py <sup>+</sup> /Py <sup>+</sup> /Py <sup>+</sup> /Glu             | 10%           | 7%  |
| Py <sup>+</sup> /Py <sup>+</sup> /Py <sup>+</sup> /Py <sup>+</sup> | 6%            | 4%  |

**Table ESI-6.** Fluorescence quantum yield ( $\Phi_F$ ) determinations for the mixed aryl porphyrins 2.5  $\mu$ M in methanol and aqueous PBS media.

**References**

1. Drain, C. M.; Lehn, J.-M., *Chem. Commun.* **1994**, 2313-2315 (correction 1995, p503).
2. Ahmad, K., *The Lancet: Oncology* **2002**, 3, (8), 451.
3. Brigger, I.; Dubernet, C.; Couvreur, P., *Adv. Drug Delivery Rev.* **2002**, 54, 631-651.
4. Fu, J.; Li, X.; Ng, D. K. P.; Wu, C., *Langmuir* **2002**, 18, (10), 3843-3847.
5. Konan, Y. N.; Berton, M.; Gurny, R.; Allemann, E., *Eur. J. Pharm. Sci.* **2003**, 18, (3-4), 241-249.
6. Roy, I.; Ohulchanskyy, T. Y.; Pudavar, H. E.; Bergey, E. J.; Oseroff, A. R.; Morgan, J.; Dougherty, T. J.; Prasad, P. N., *J. Am. Chem. Soc.* **2003**, 125, 7860-7865.
7. Yan, F.; Kopelman, R., *Photochem. Photobiol.* **2003**, 78, (6), 587-591.
8. Vargas, A.; Pegaz, B.; Debeve, E.; Konan-Kouakou, Y.; Lange, N.; Ballini, J.-P.; van den Bergh, H.; Gurny, R.; Delie, F., *Inter. J. Pharm.* **2004**, 286, 131-145.
9. Pegaz, B.; Debeve, E.; Borle, F.; Ballini, J.-P.; van de Bergh, H.; Konan-Kouakou, Y. N., *J. Photochem. Photobiol., B* **2005**, 80, (1), 19-27.
10. Chithrani, B. D.; Ghazani, A. A.; Chan, W. C. W., *Nano Lett.* **2006**, 6, (4), 662-668.
11. Wieder, M. E.; Hone, D. C.; Cook, M. J.; Handsley, M. M.; Gavrilovic, J.; Russell, D. A., *Photochem. Photobiol. Sci.* **2006**, 5, (8), 727-734.
12. Drain, C. M.; Gentemann, S.; Roberts, J. A.; Nelson, N. Y.; Medforth, C. J.; Jia, S.; Simpson, M. C.; Smith, K. M.; Fajer, J.; Shelnut, J. A.; Holten, D., *J. Am. Chem. Soc.* **1998**, 120, (15), 3781-3791.
13. Harriman, A.; Hosie, R. J., *J. Photochem.* **1981**, 15, 163-167.
14. Kuszaj, S.; Kaszycki, P.; Wasylewski, Z., *Chem. Phys. Lipids* **1996**, 83, 153-160.
15. Akins, D. L.; Ozcelik, S.; Zhu, H. R.; Guo, C., *J. Phys. Chem.* **1996**, 100, 14390 - 14396.
16. Chen, X.; Drain, C. M., *Drug Design Reviews - Online* **2004**, 1, (3), 215-234.
17. Gong, X.; Milic, T.; Xu, C.; Batteas, J. D.; Drain, C. M., *J. Am. Chem. Soc.* **2002**, 124, (48), 14290-14291.
18. Drain, C. M.; Smeureanu, G.; Patel, S.; Gong, X.; Garno, J.; Arijeloye, J., *New J. Chem.* **2006**, 12, 1834-1843.
19. Yang, S. I.; Seth, J.; Strachan, J.-P.; Gentleman, S.; Kim, D.; Holten, D.; Lindsey, J. S.; Bocian, D. F., *J. Porphyrins Phthalocyanines* **1999**, 3, (2), 117-147.
20. Kamat, P. V.; Das, S.; Thomas, K. G.; George, M. V., *J. Phys. Chem.* **1992**, 96, (1), 195-199.
21. Bonnett, R.; Martinez, G., *Tetrahedron* **2001**, 57, (47), 9513-9547.
22. Stevens, N. PhD. Dissertation, The Graduate School and University Center of the City of New York, New York, 2006.
